# Supplementary material for: Coordination of RAB-8 and RAB-11 during unconventional protein secretion
Source: PubMed Central journal article supplement — J Cell Biol. 2023 Nov 29;223(2):e202306107. doi: 10.1083/jcb.202306107 (PMC10686230; doi:10.1083/jcb.202306107), 2023-11-29
Supplement: JCB_202306107_SourceDataF2.pdf [file JCB_202306107_SourceDataF2.pdf]

Figure 2B

IP MC

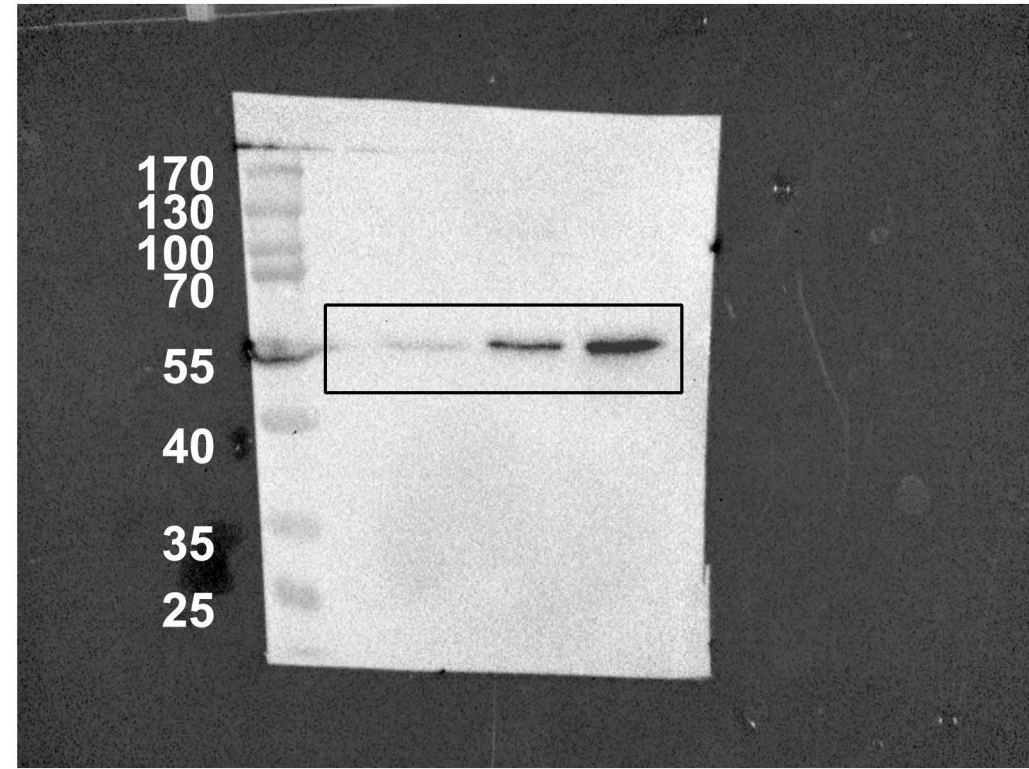

IP GFP

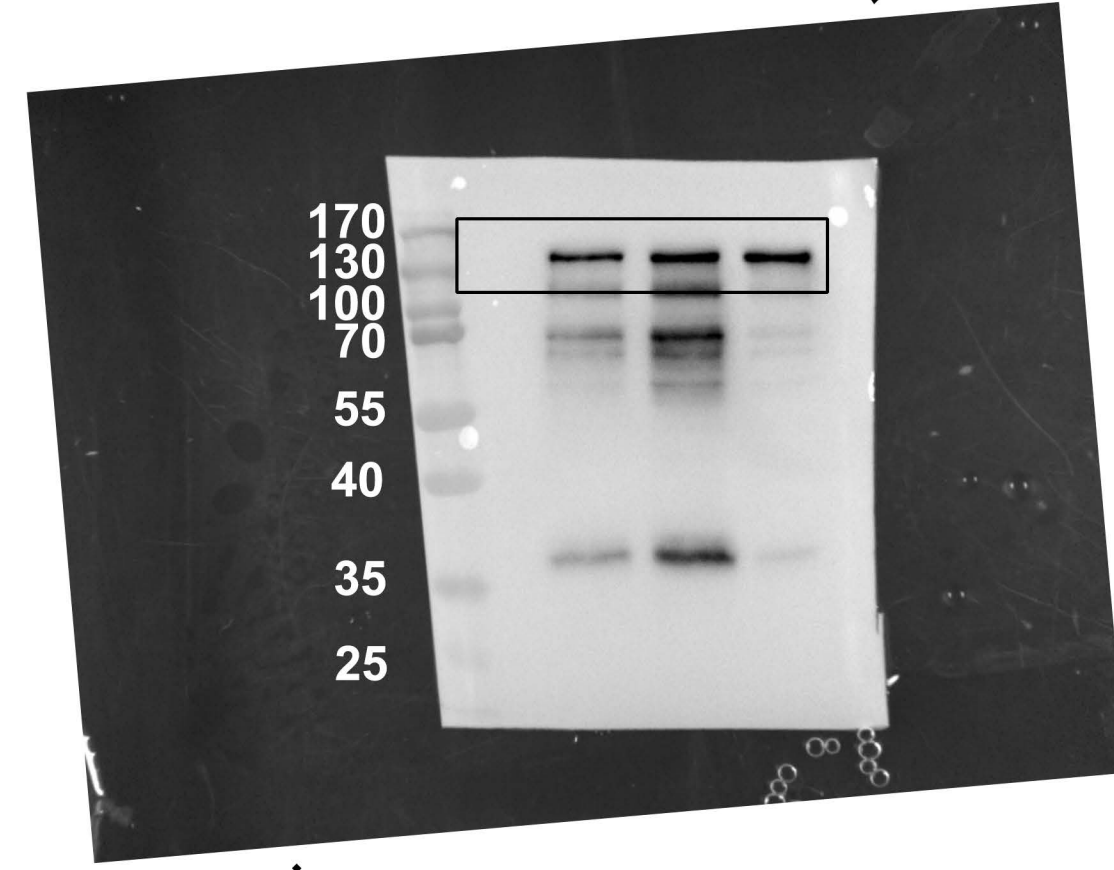

MC::RAB-8  
EHBP-1::GFP  
EHBP-1::GFP;MC::RAB-8  
rabi-8(tm2518)

MC::RAB-8  
EHBP-1::GFP  
EHBP-1::GFP;MC::RAB-8  
rabi-8(tm2518)

MC::RAB-8  
EHBP-1::GFP  
EHBP-1::GFP;MC::RAB-8  
rabi-8(tm2518)

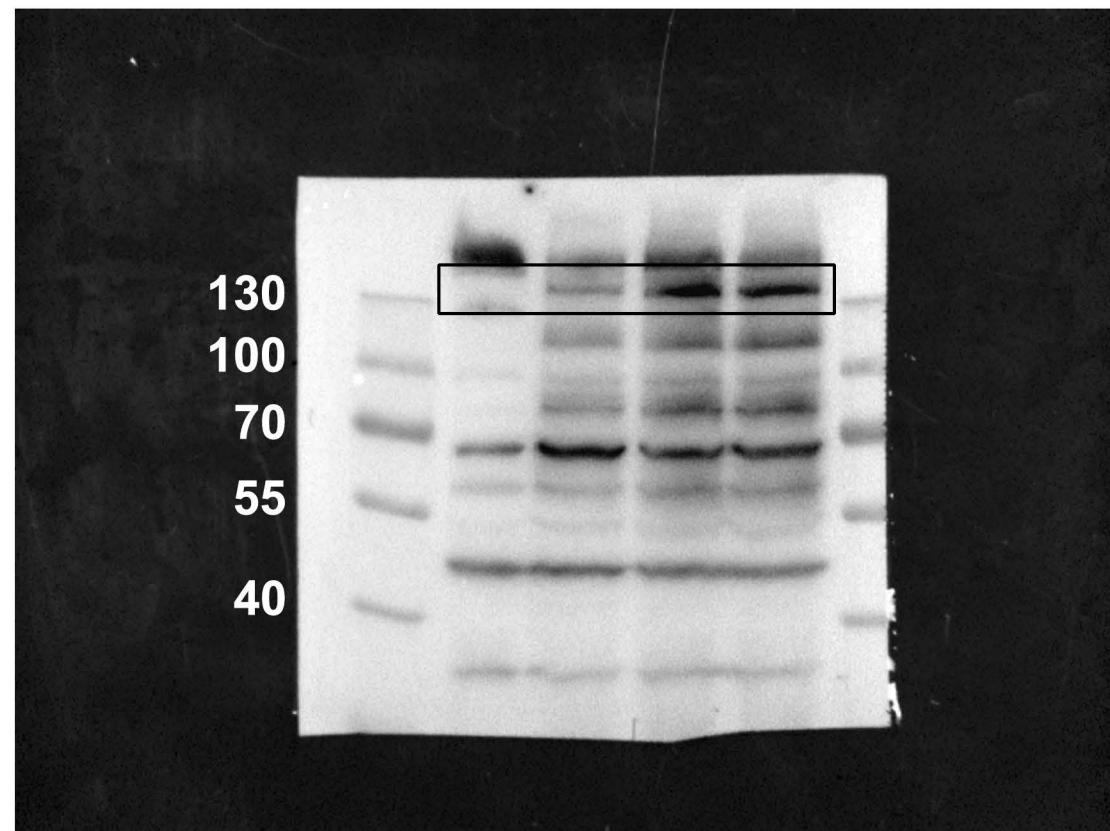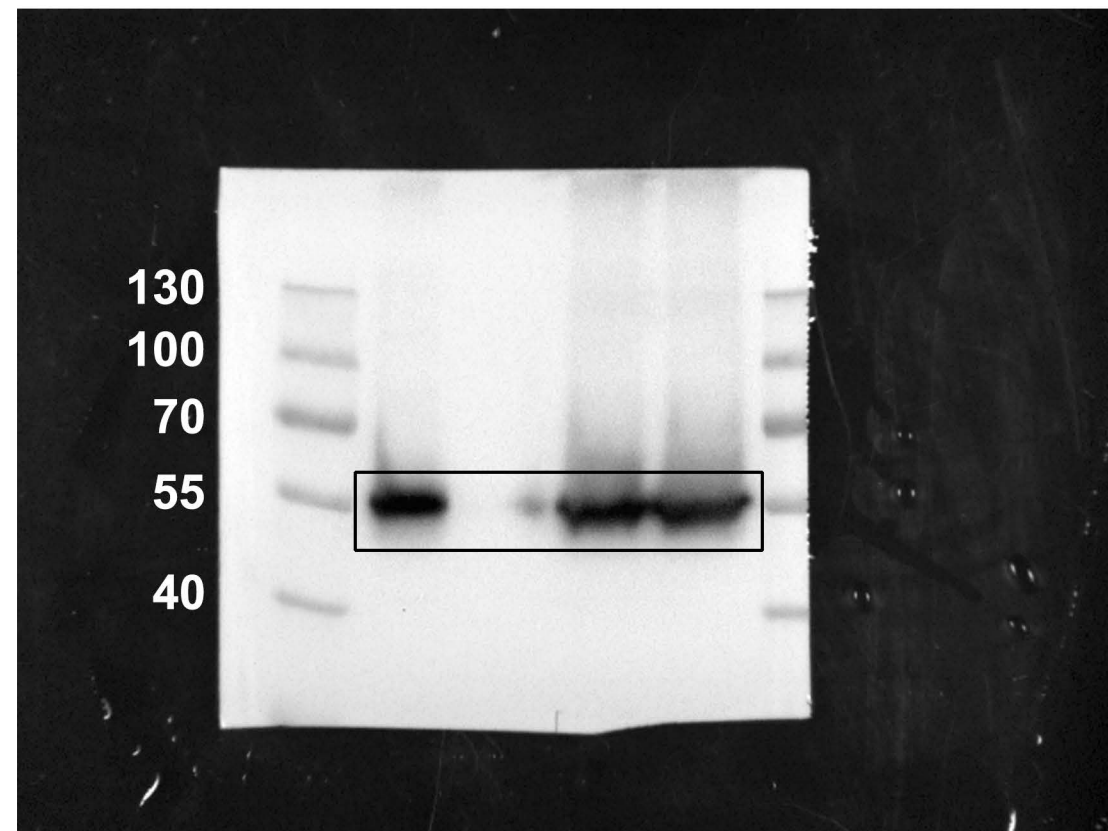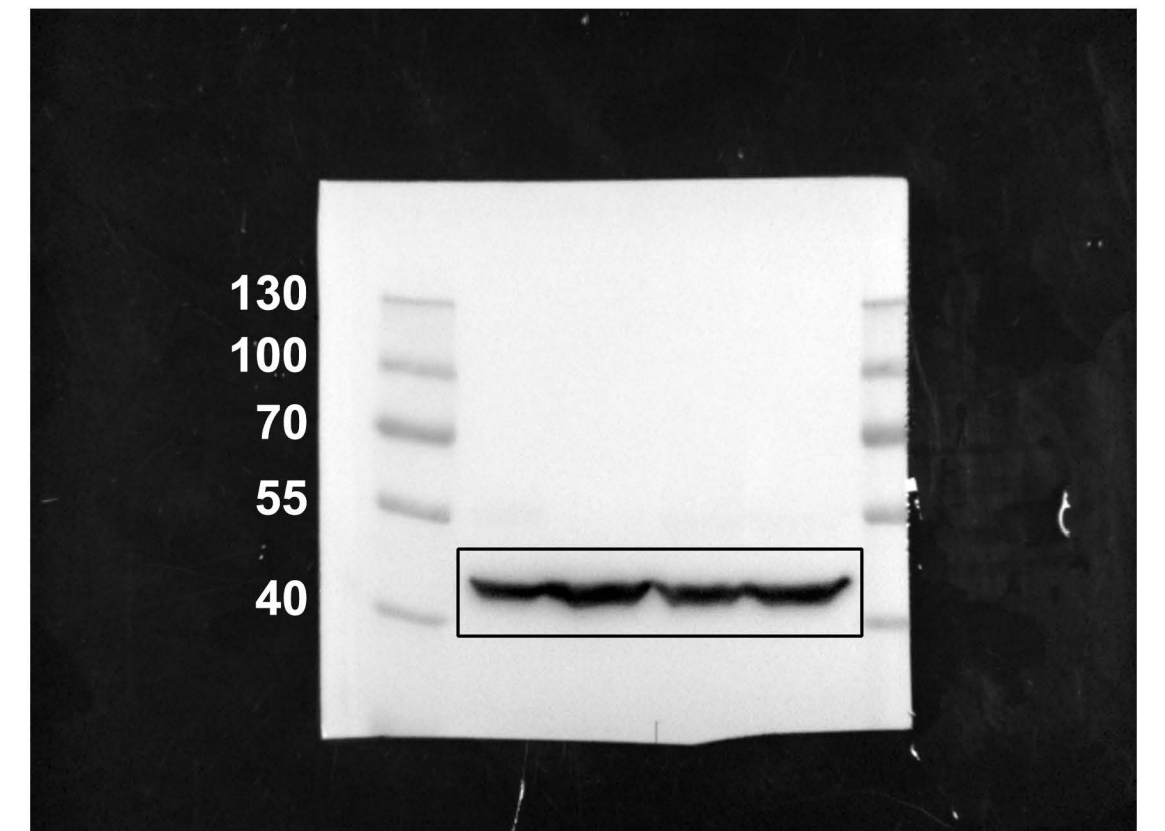

Lysate GFP

Lysate MC

Lysate actin
