# Supplementary material for: Coordination of RAB-8 and RAB-11 during unconventional protein secretion
Source: PubMed Central journal article supplement — J Cell Biol. 2023 Nov 29;223(2):e202306107. doi: 10.1083/jcb.202306107 (PMC10686230; doi:10.1083/jcb.202306107), 2023-11-29

Figure 5A

IP MC

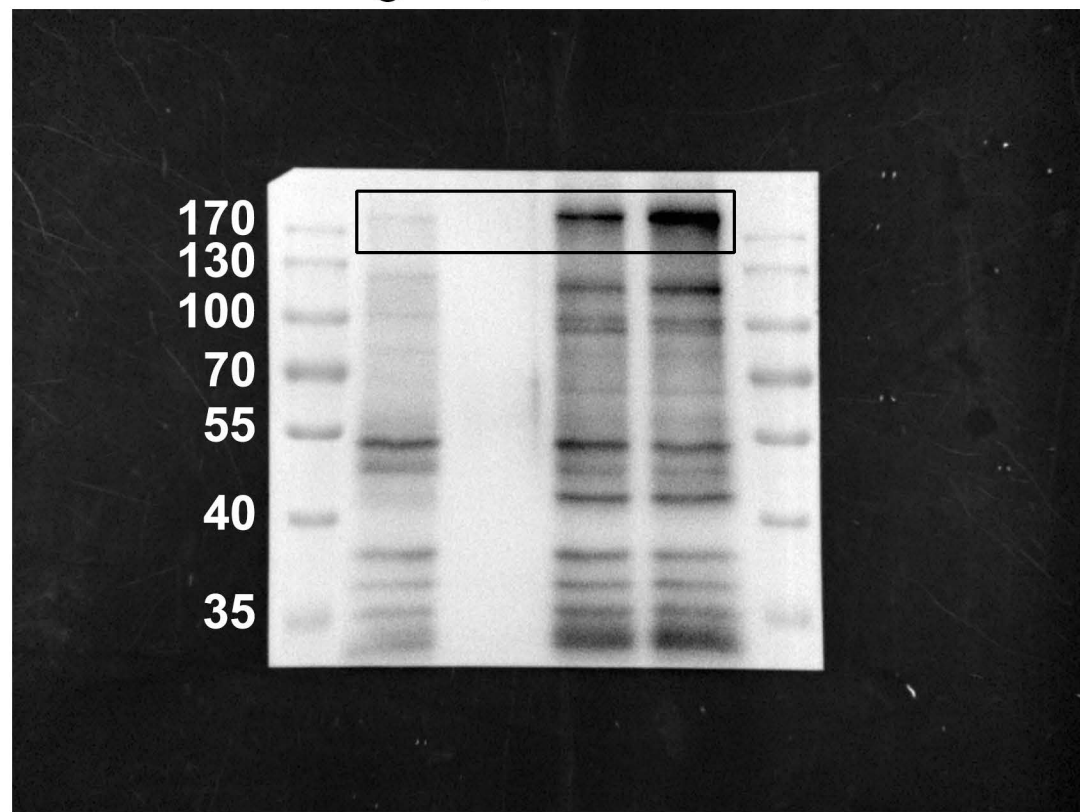

IP GFP

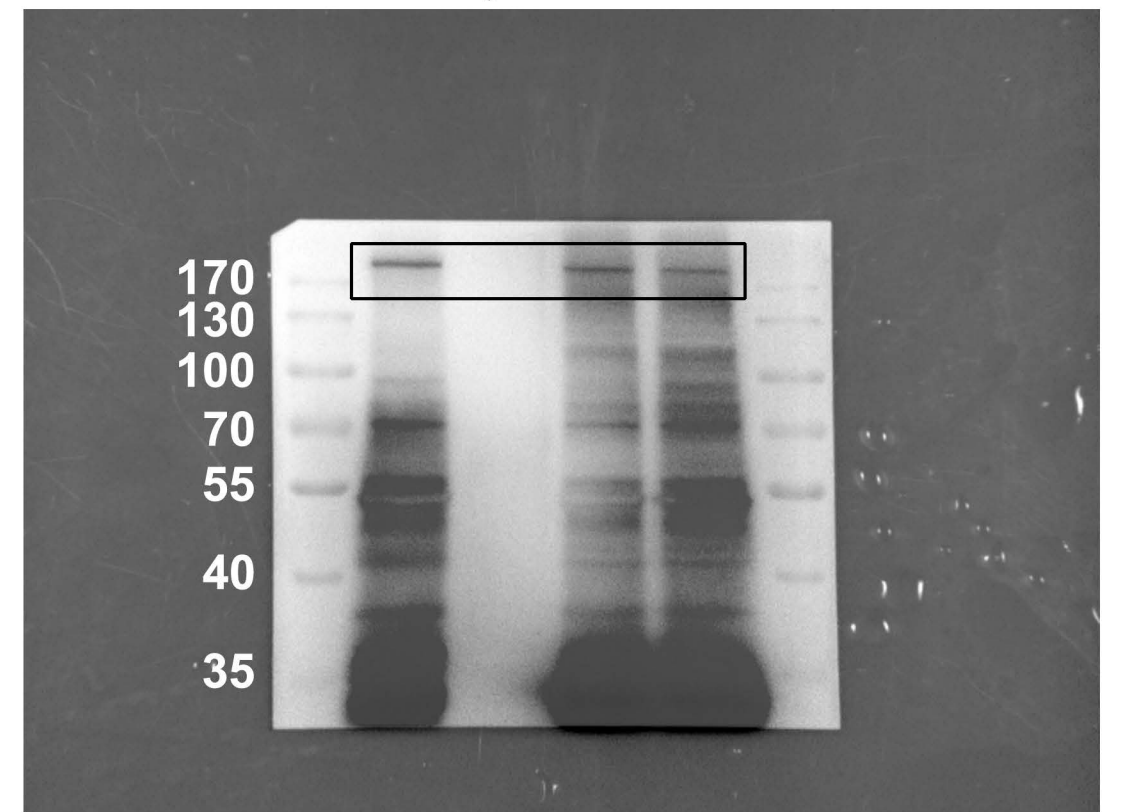

GFP::SMGL-1  
MC::SMGL-1  
GFP::SMGL-1  
GFP::SMGL-1; MC::SMGL-1  
*rabi-8(tm2518)*

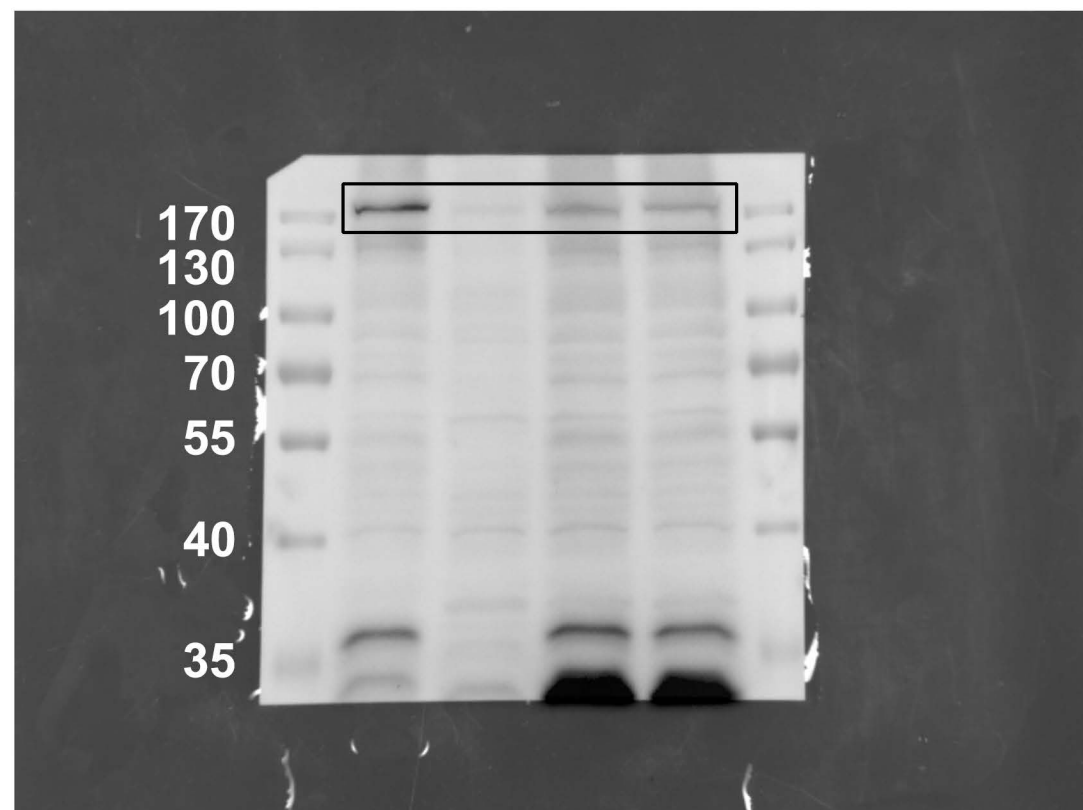

Lysate GFP

GFP::SMGL-1  
MC::SMGL-1  
GFP::SMGL-1  
GFP::SMGL-1; MC::SMGL-1  
*rabi-8(tm2518)*

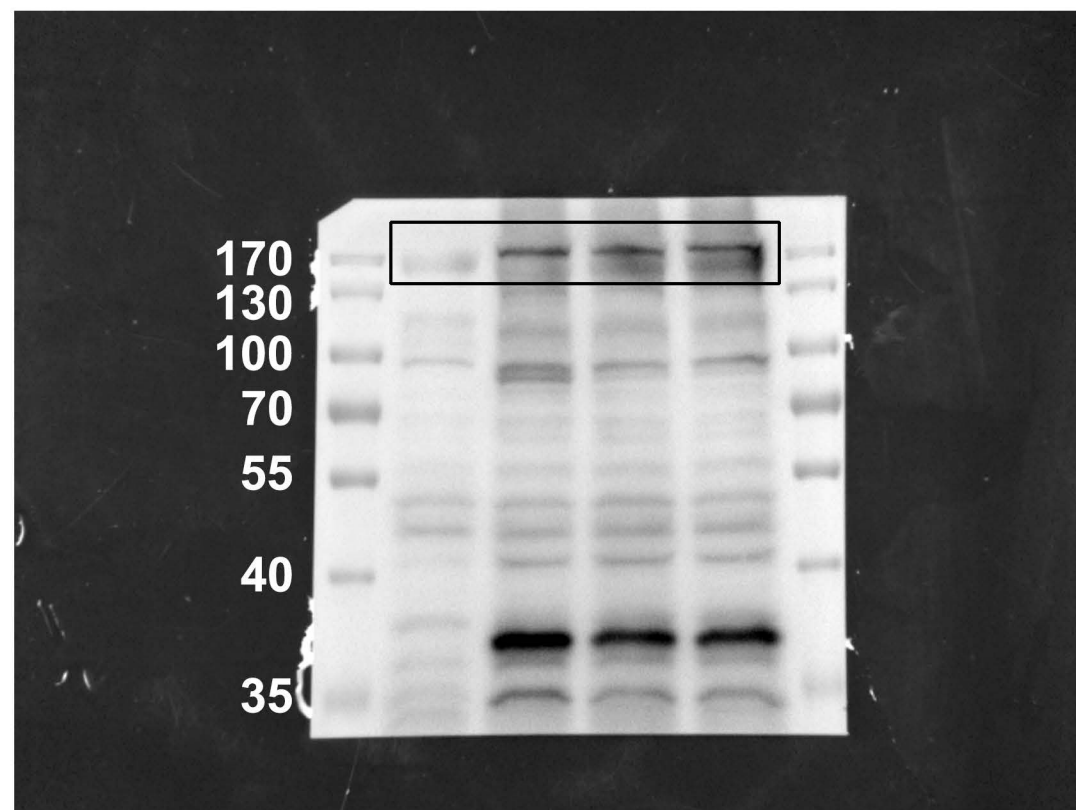

Lysate MC

GFP::SMGL-1  
MC::SMGL-1  
GFP::SMGL-1  
GFP::SMGL-1; MC::SMGL-1  
*rabi-8(tm2518)*

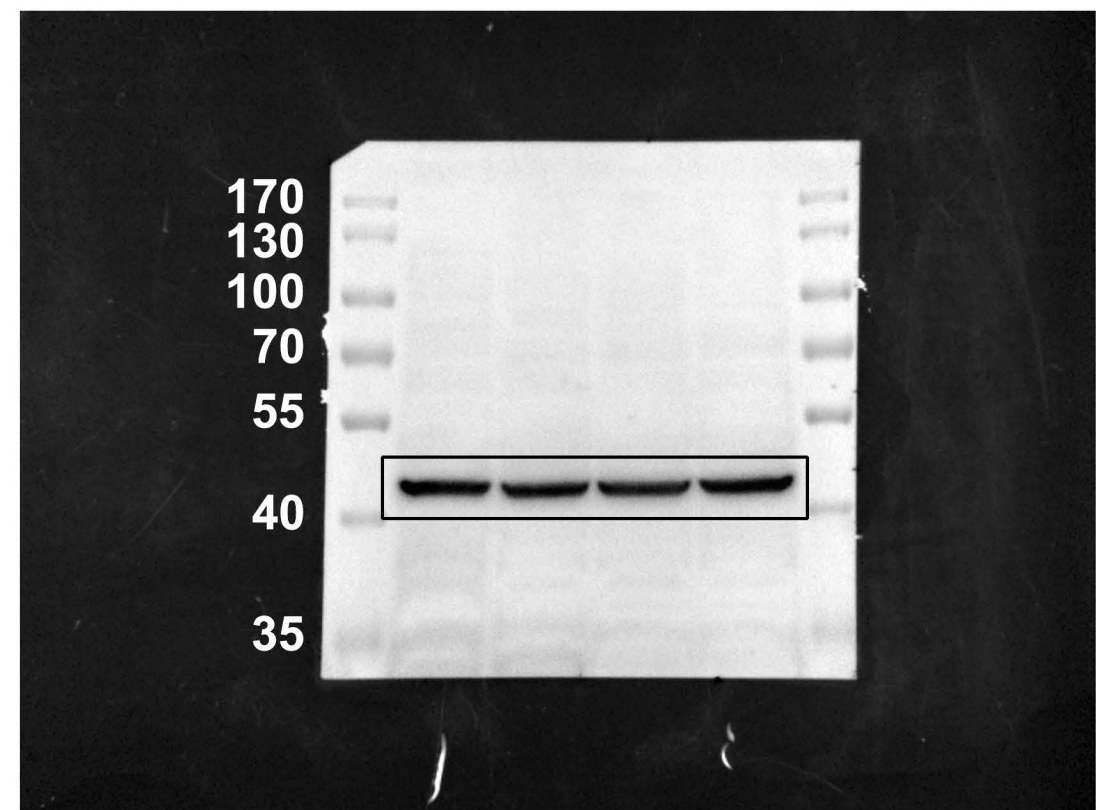

Lysate actin

**Figure 5B**

**HA-SMGL-1 NT**

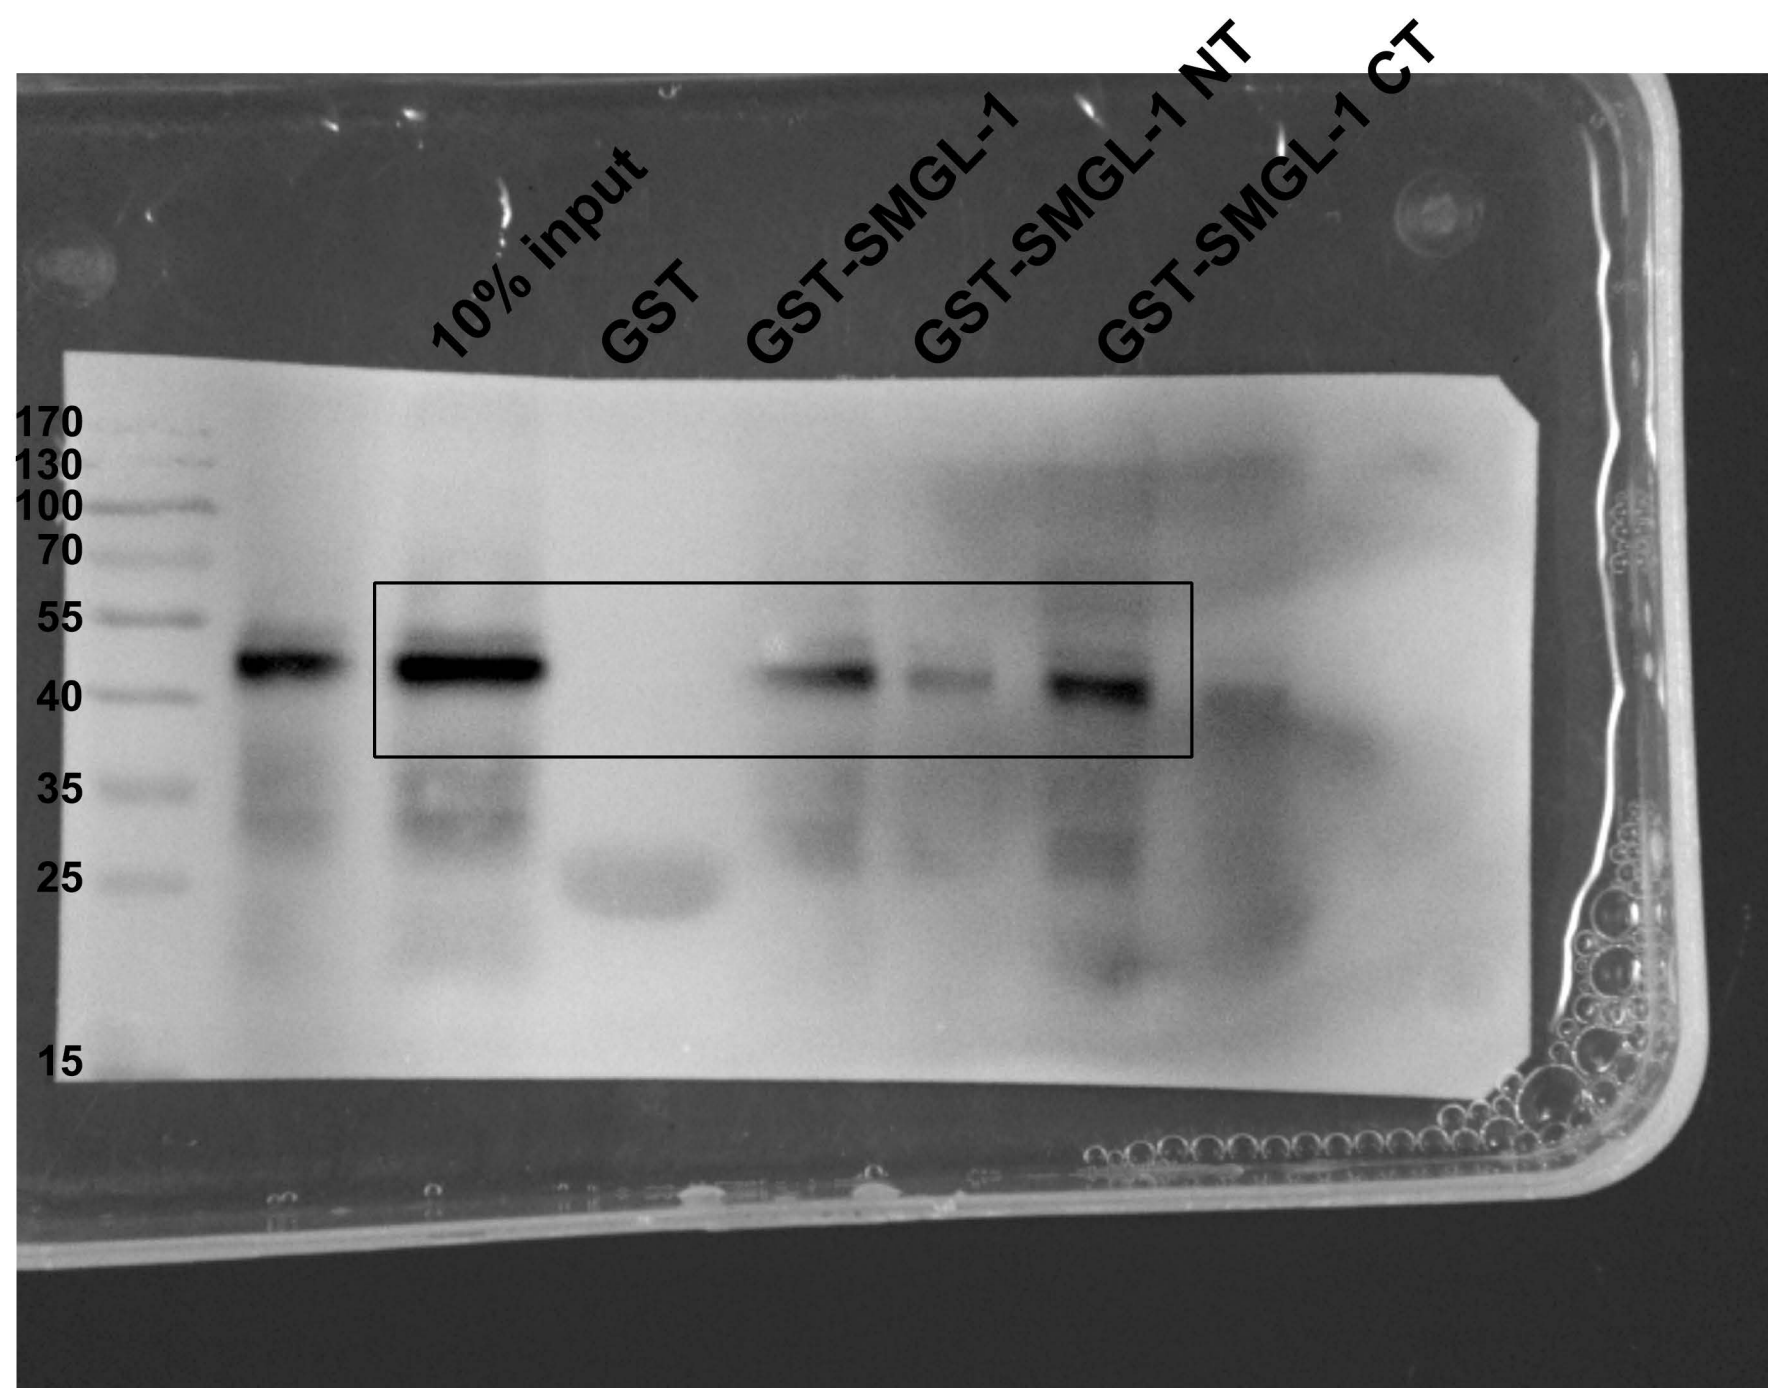

Supplement: JCB_202306107_SourceDataF5.pdf [file JCB_202306107_SourceDataF5.pdf]
