# Supplementary material for: Coordination of RAB-8 and RAB-11 during unconventional protein secretion
Source: PubMed Central journal article supplement — J Cell Biol. 2023 Nov 29;223(2):e202306107. doi: 10.1083/jcb.202306107 (PMC10686230; doi:10.1083/jcb.202306107), 2023-11-29
Supplement: JCB_202306107_SourceDataFS3.pdf [file JCB_202306107_SourceDataFS3.pdf]

# sFigure 3D

**GFP::*SMGL-1***

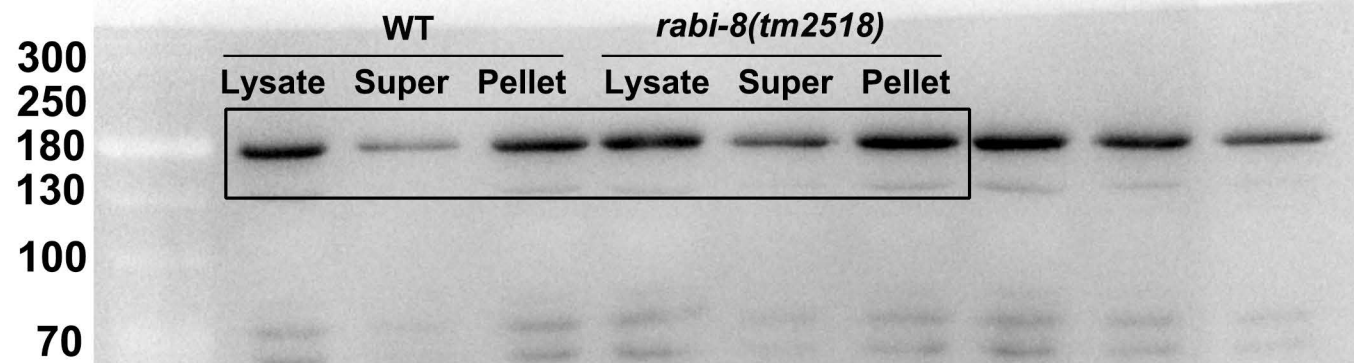

**Actin**

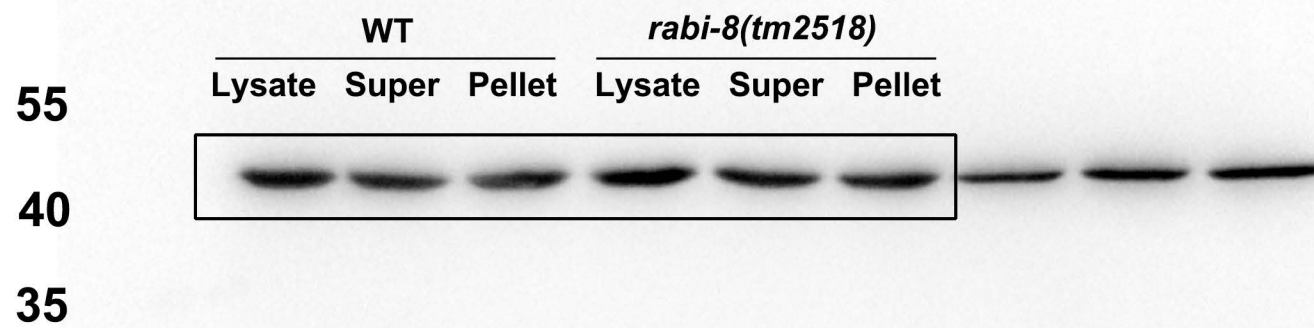

sFigure 3E

IP GFP

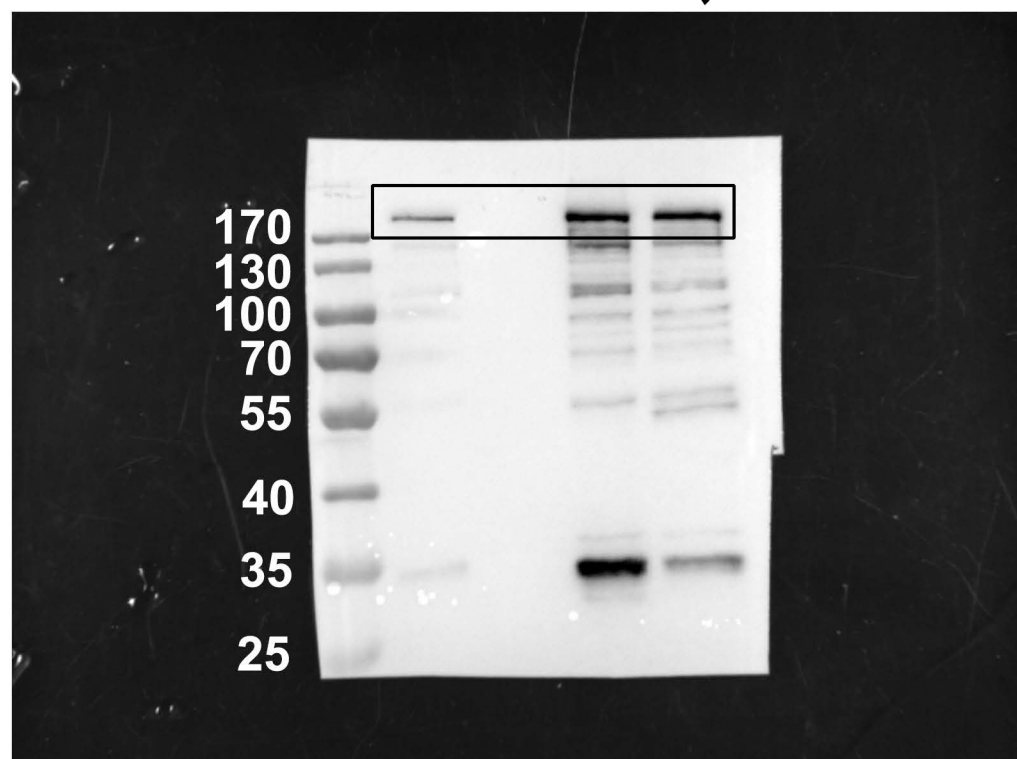

IP MC

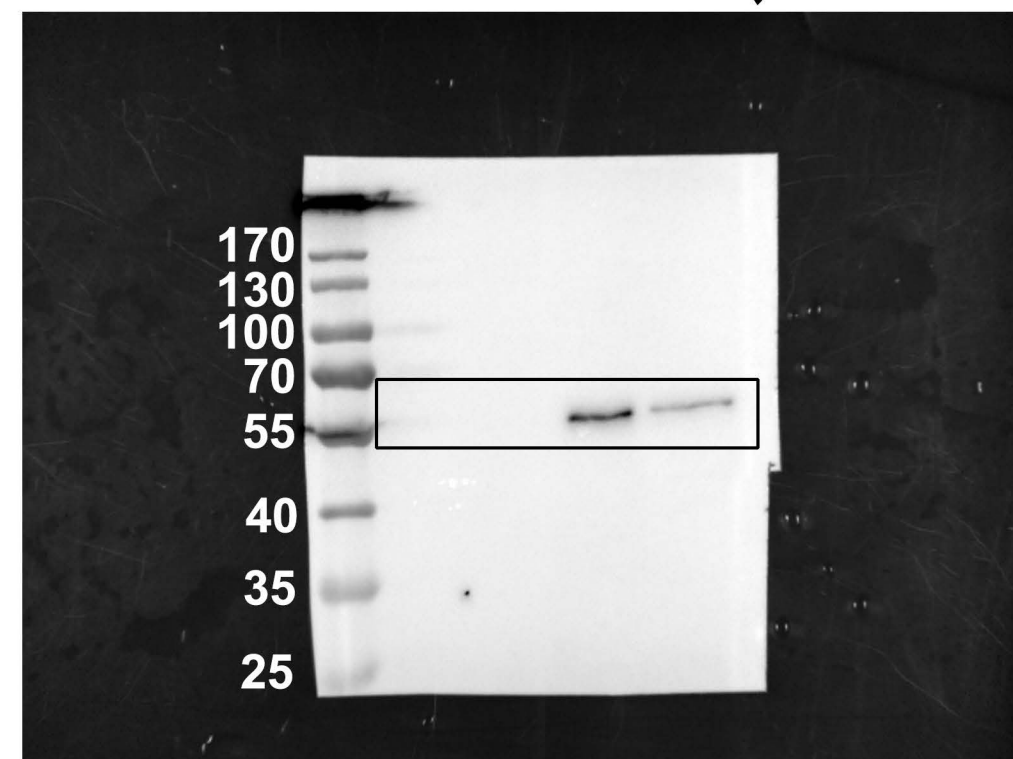

GFP::SMGL-1  
MC::RAB-8  
GFP::SMGL-1;MC::RAB-8  
rabi-8(tm2518)

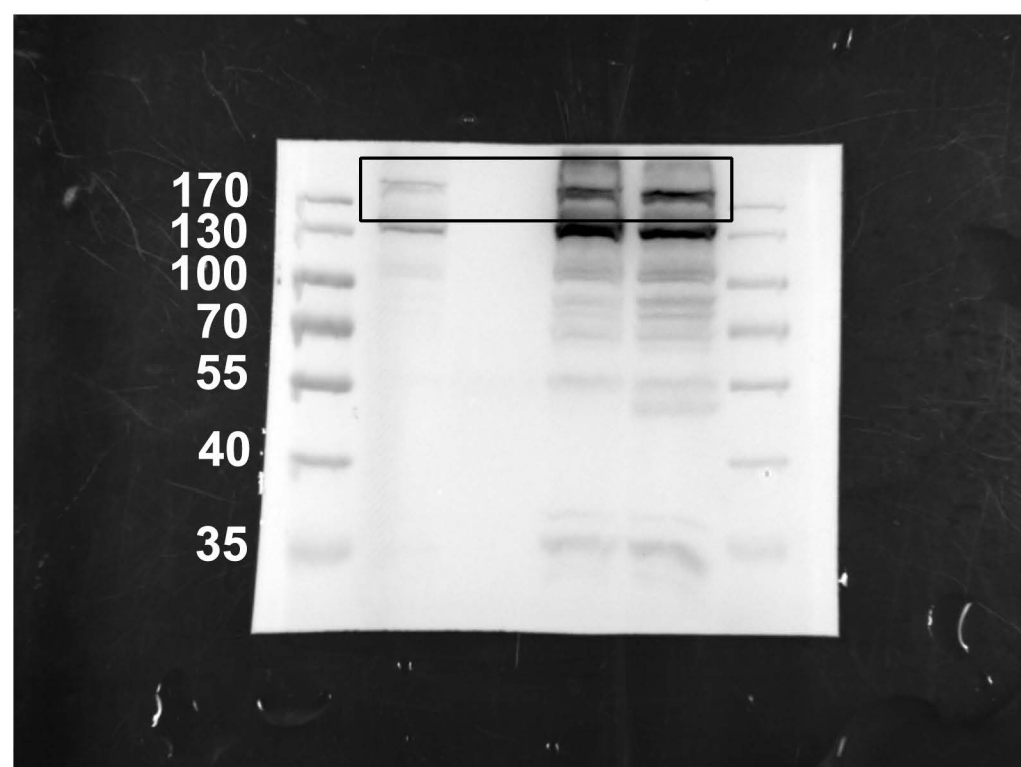

Lysate GFP

GFP::SMGL-1  
MC::RAB-8  
GFP::SMGL-1;MC::RAB-8  
rabi-8(tm2518)

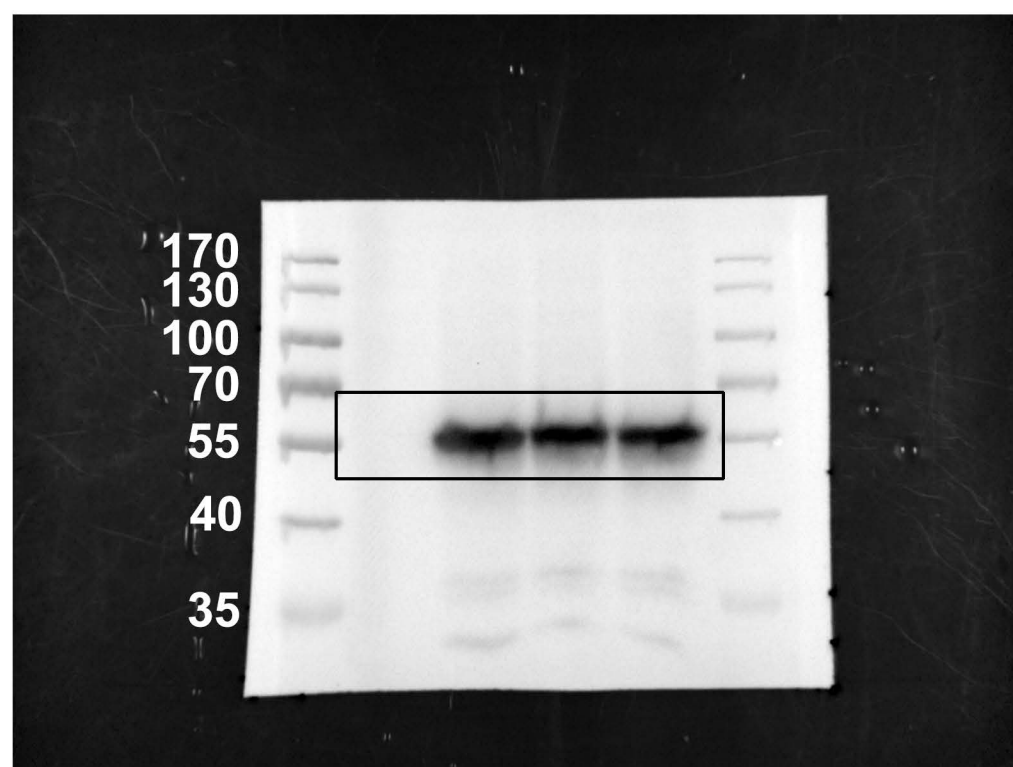

Lysate MC

GFP::SMGL-1  
MC::RAB-8  
GFP::SMGL-1;MC::RAB-8  
rabi-8(tm2518)

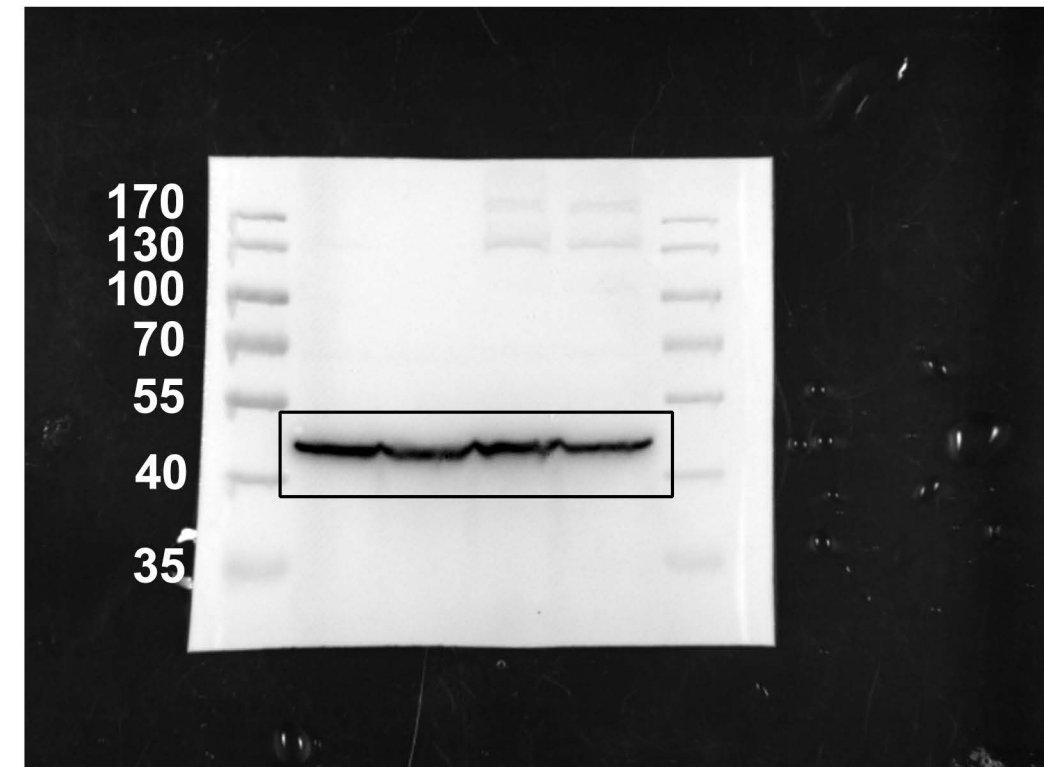

Lysate actin
