# Supplementary figures and images for: Coordination of RAB-8 and RAB-11 during unconventional protein secretion
Source: PubMed Central journal article supplement — J Cell Biol. 2023 Nov 29;223(2):e202306107. doi: 10.1083/jcb.202306107 (PMC10686230; doi:10.1083/jcb.202306107), 2023-11-29

**Figure 1A**

**RABI-8**

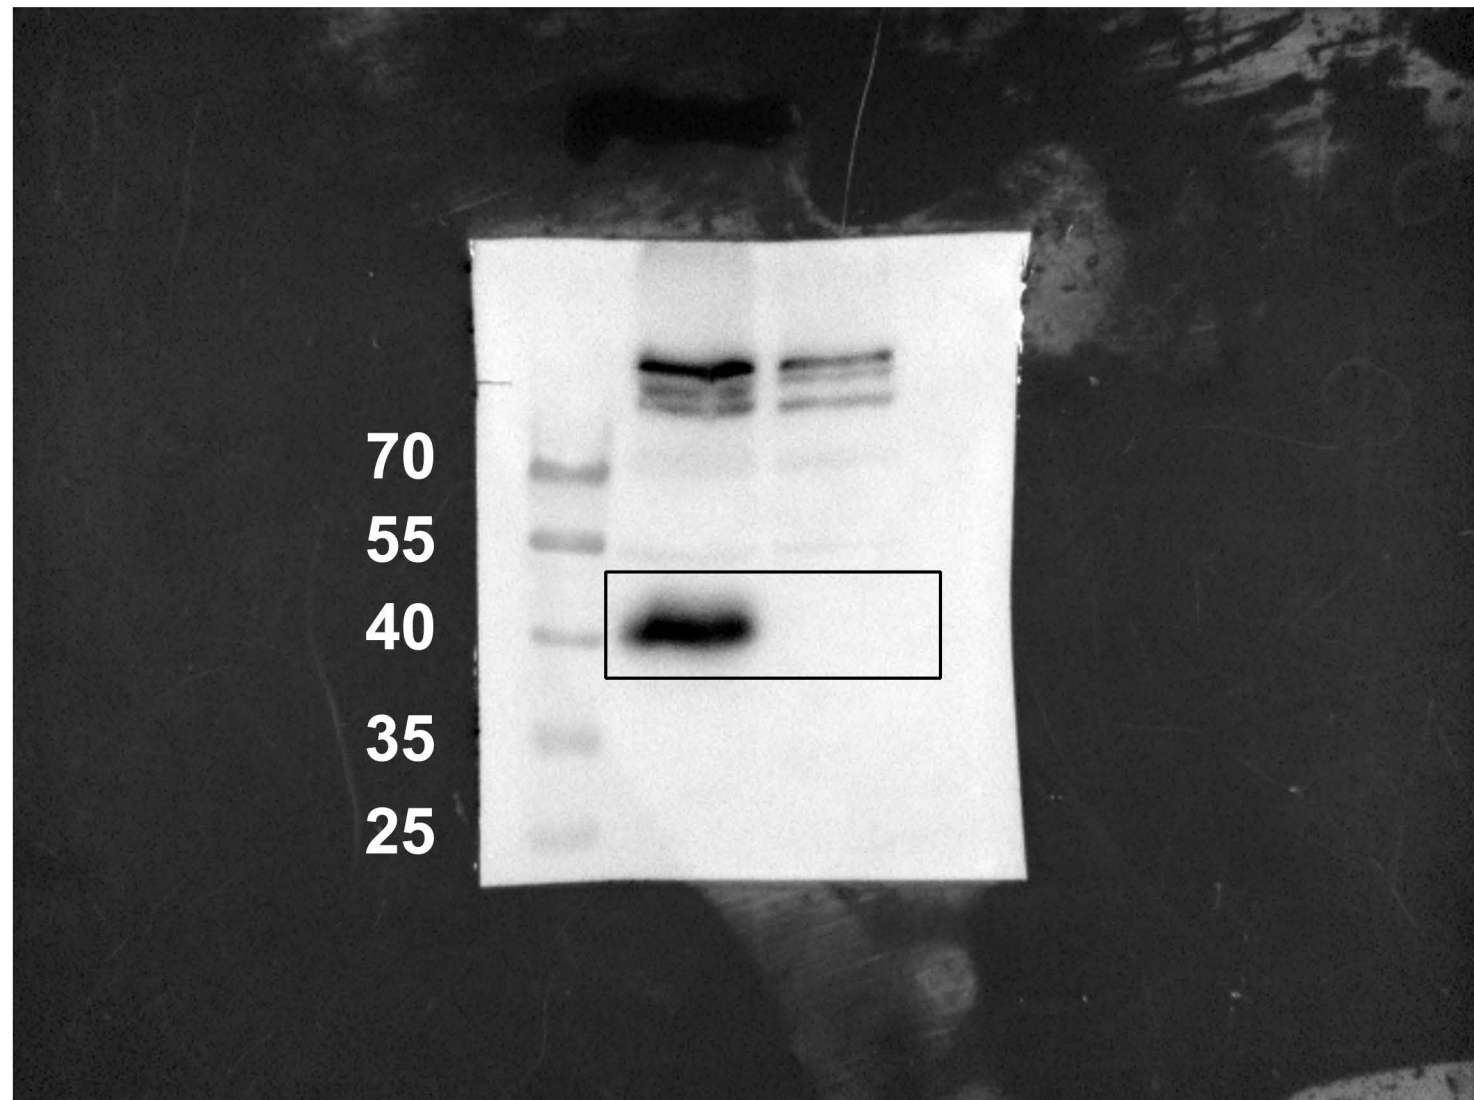

**Actin**

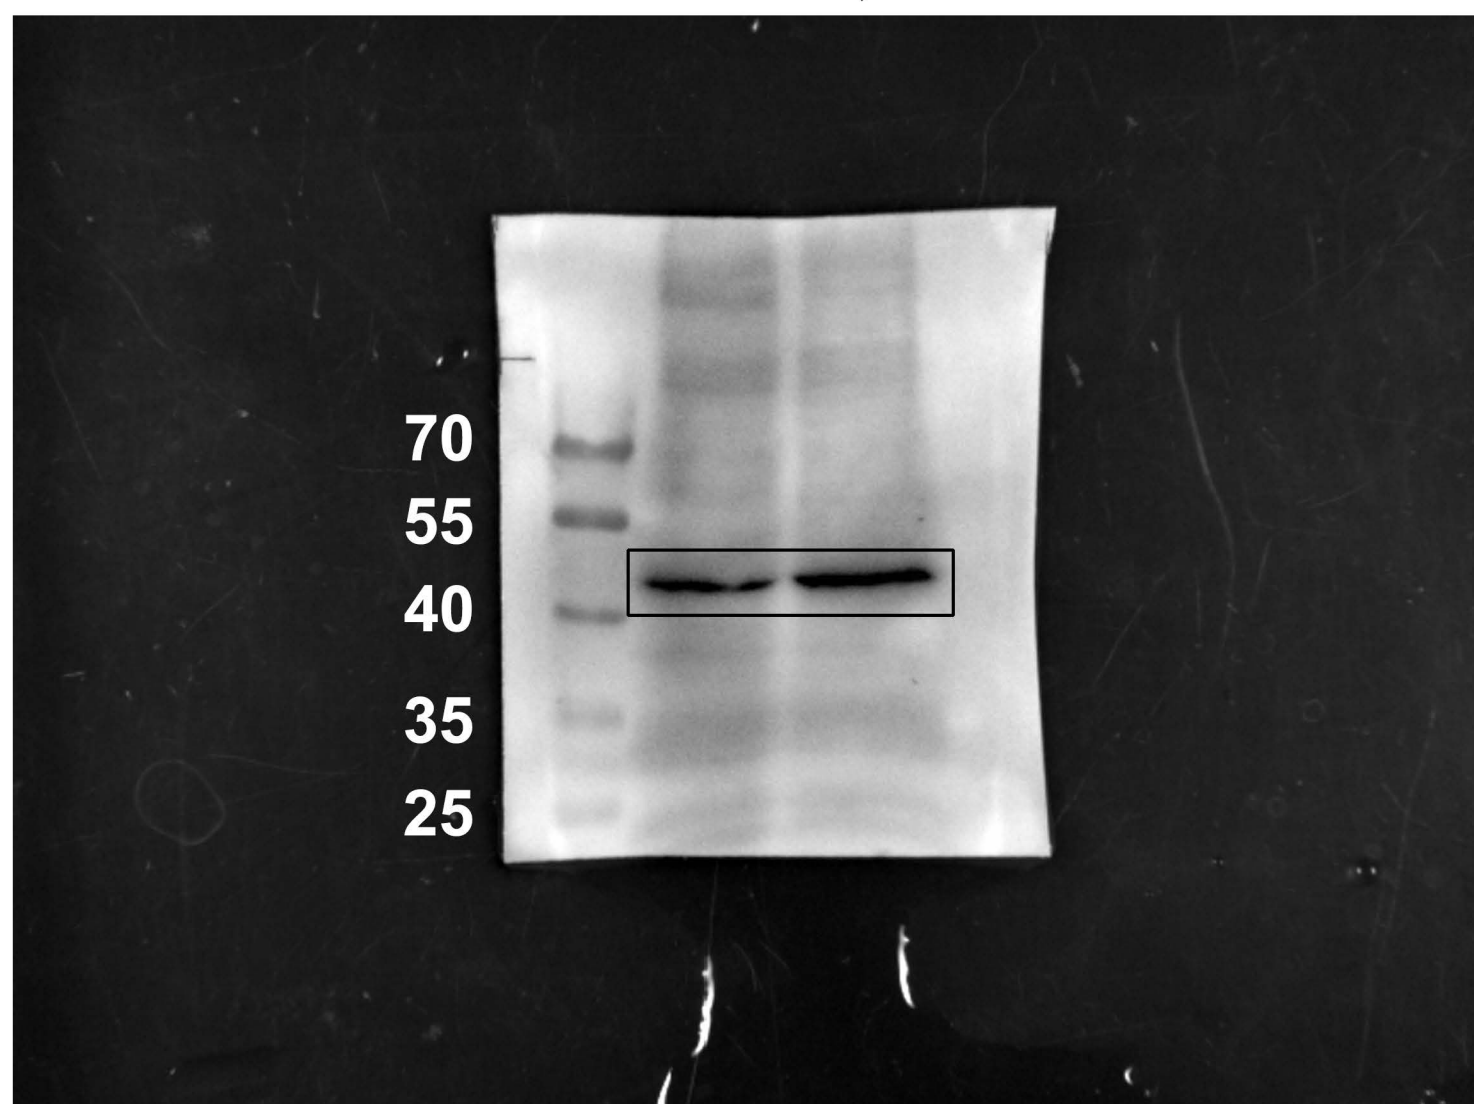

Supplement: JCB_202306107_SourceDataF1.pdf [file JCB_202306107_SourceDataF1.pdf]

**Figure 4A**

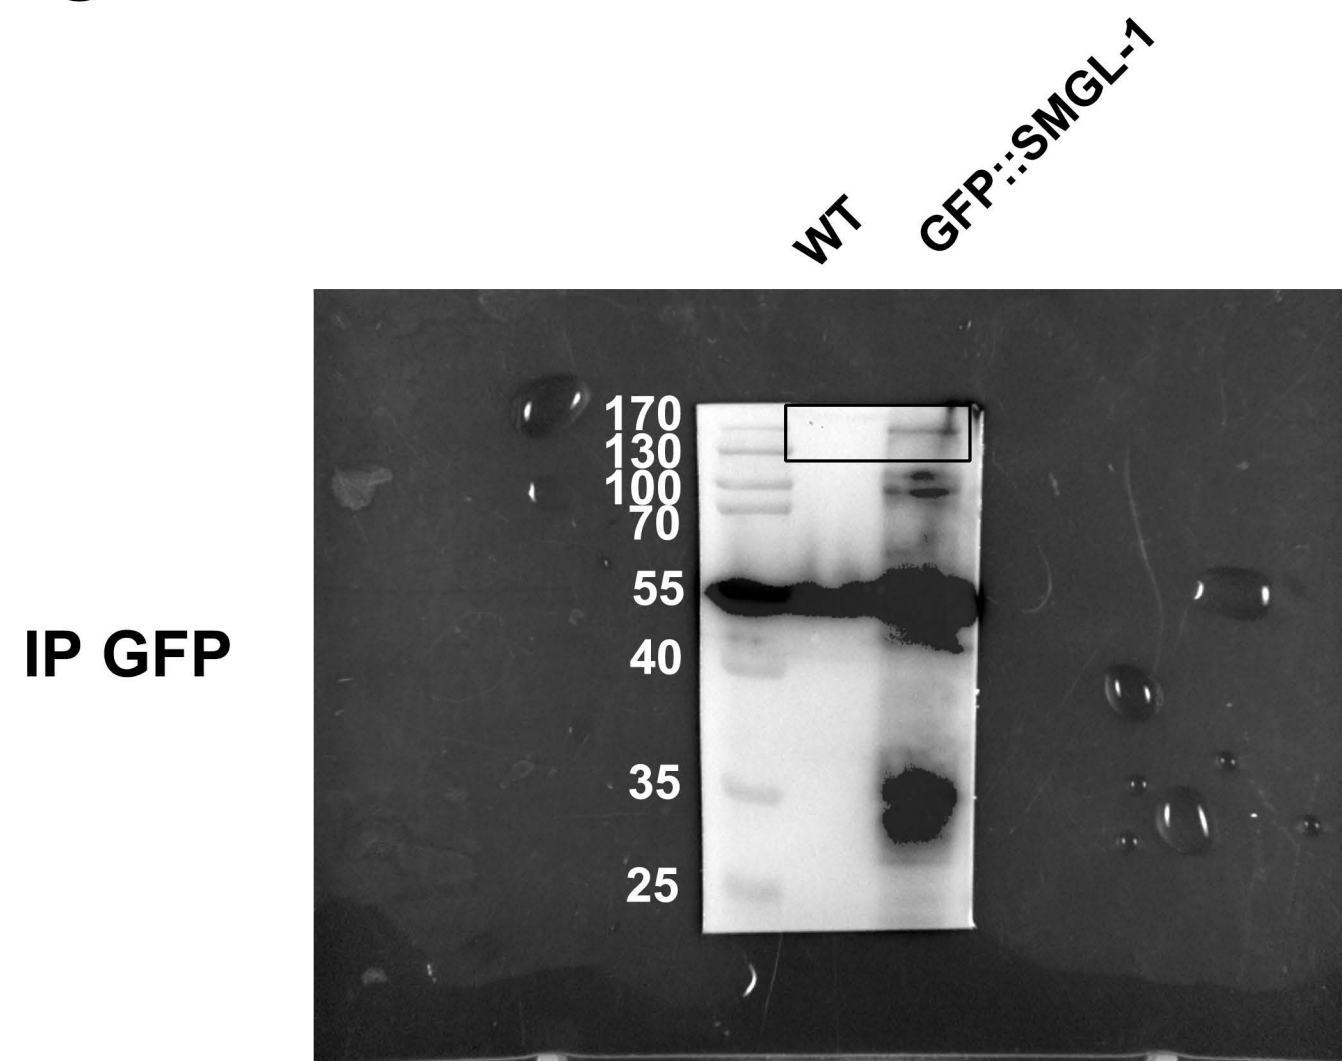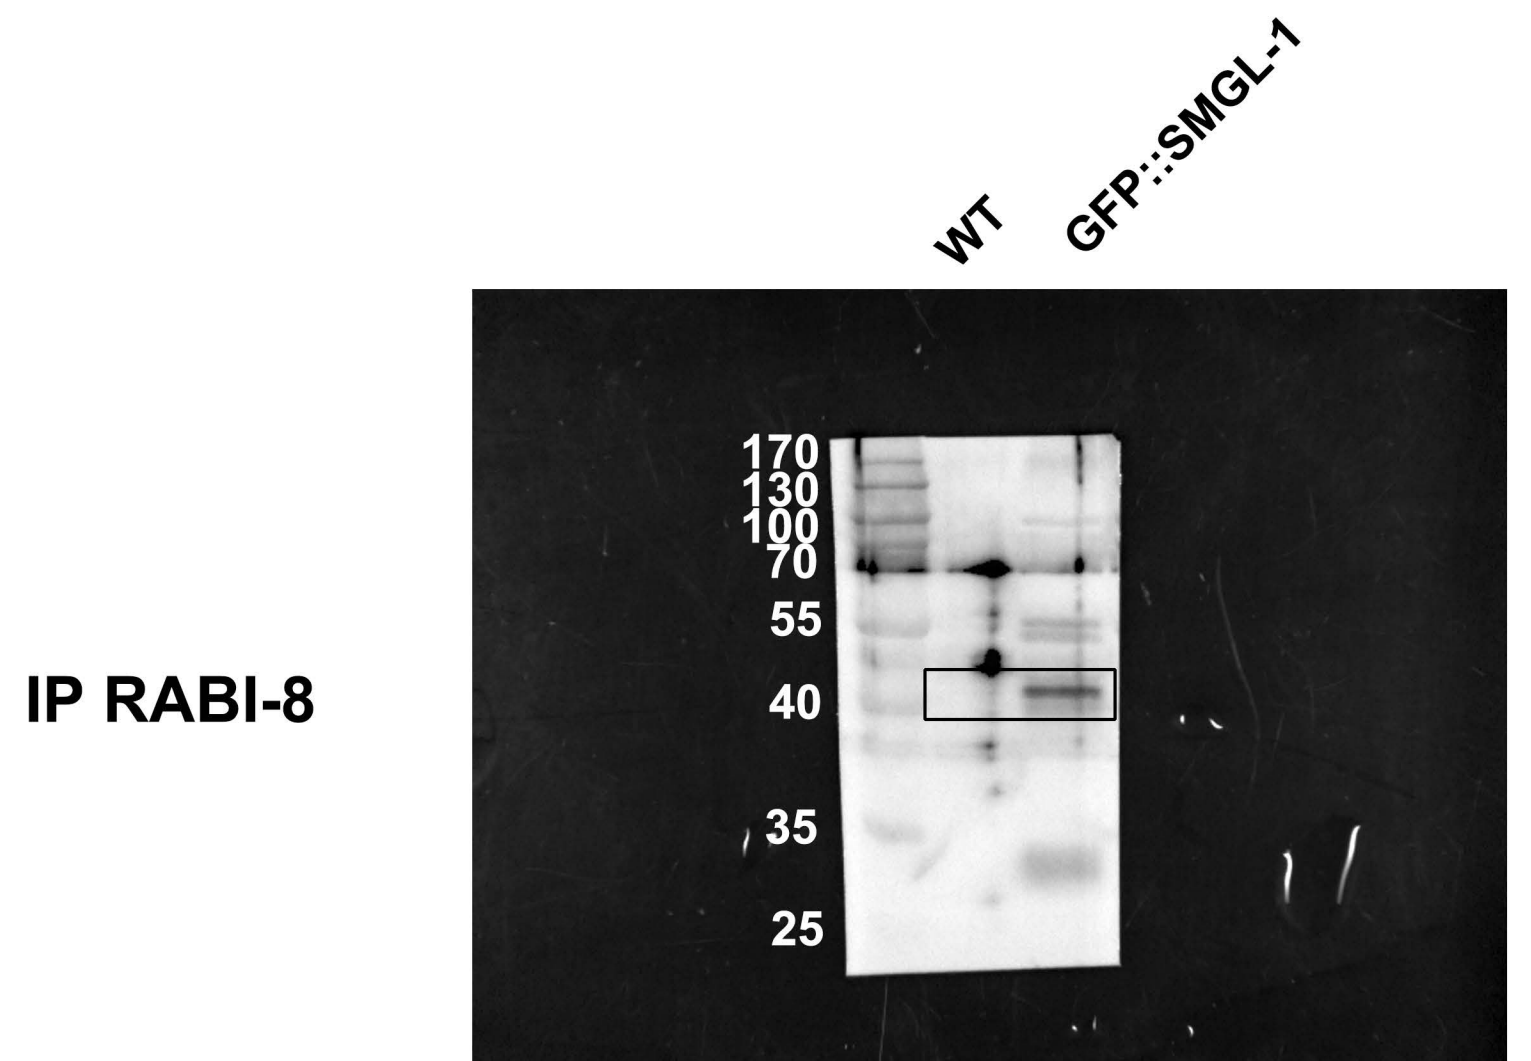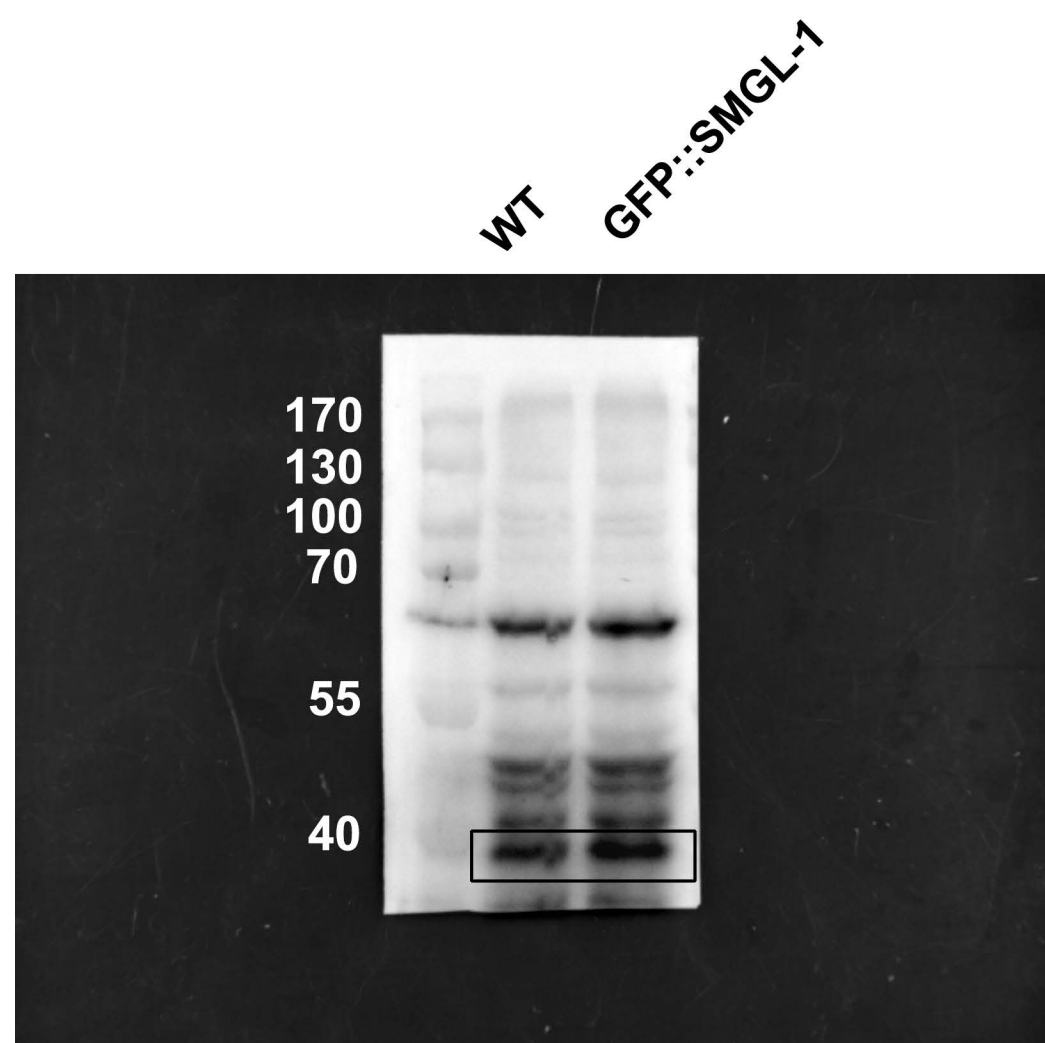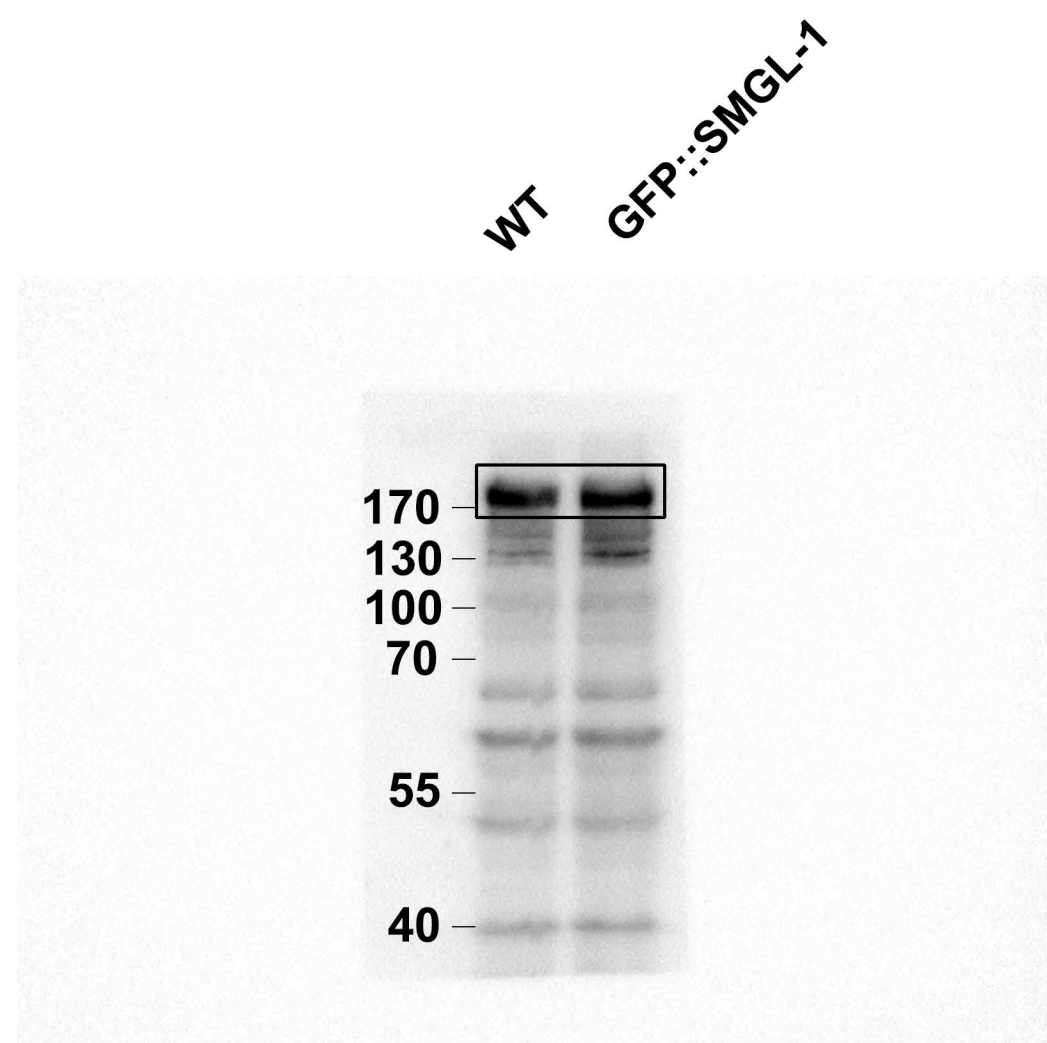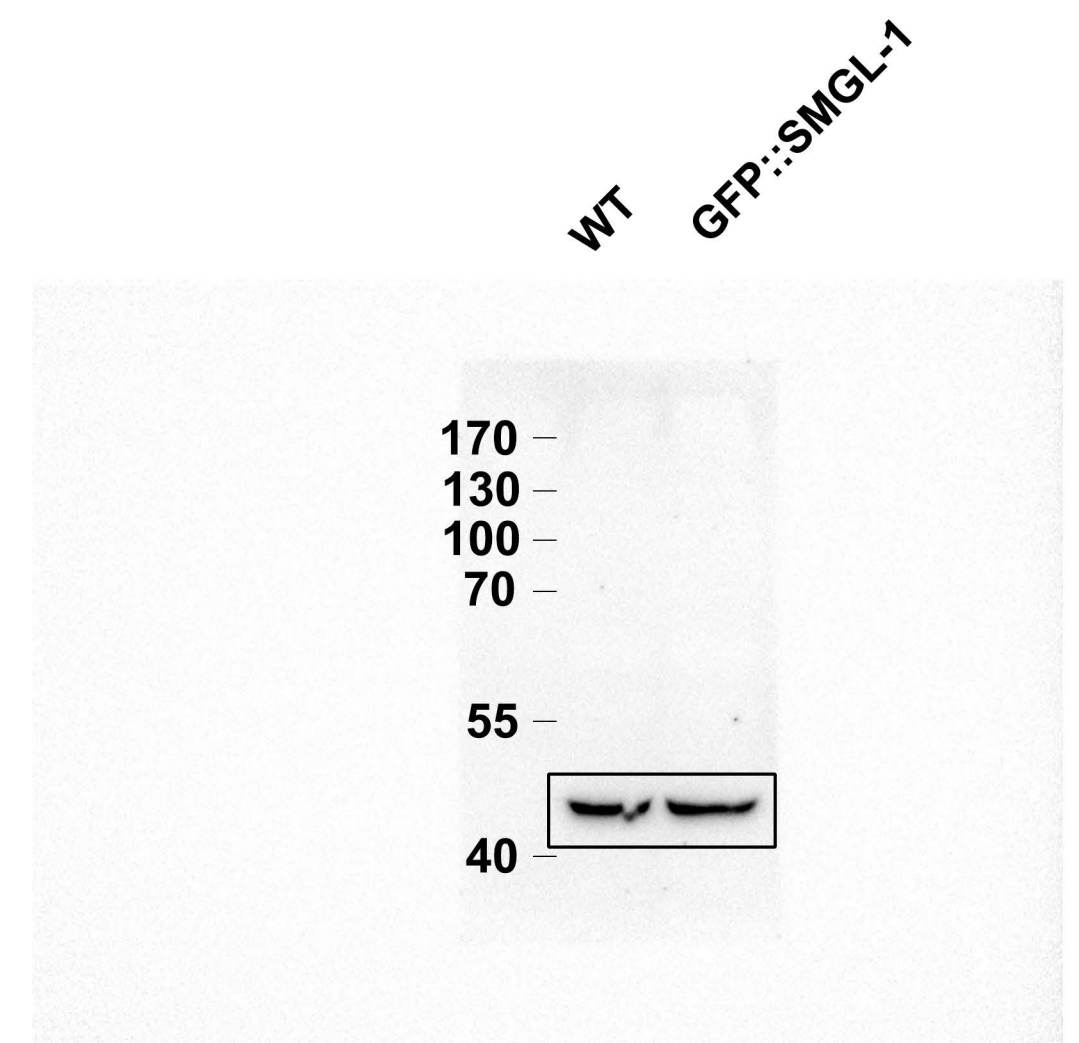

**Lysate RABI-8**

**Lysate GFP**

**Lysate actin**

**Figure 4B**

**HA-RABI-8**

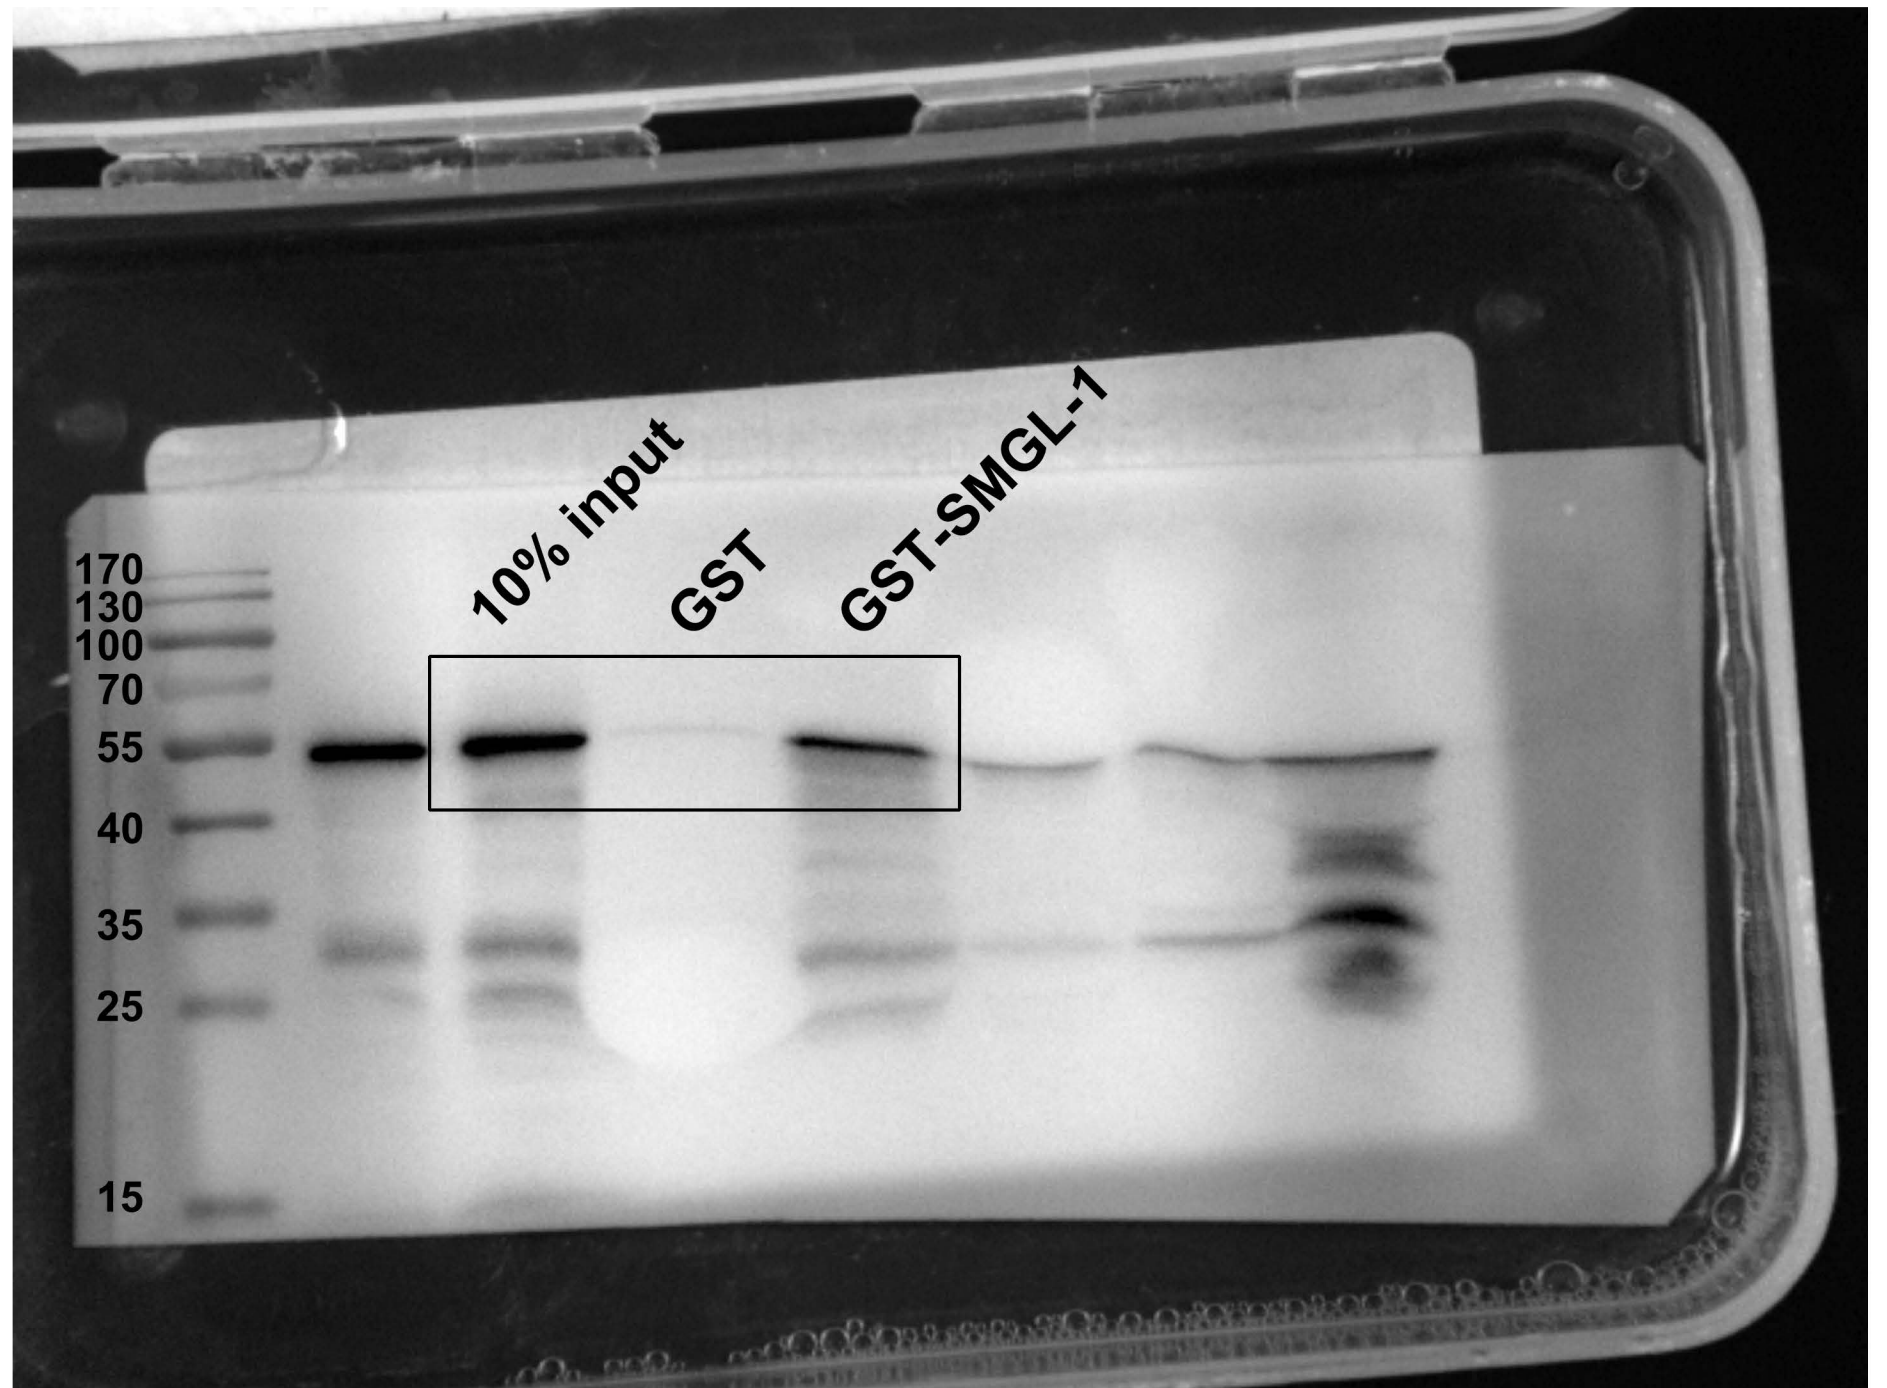

Supplement: JCB_202306107_SourceDataF4.pdf [file JCB_202306107_SourceDataF4.pdf]

**Figure 6B**

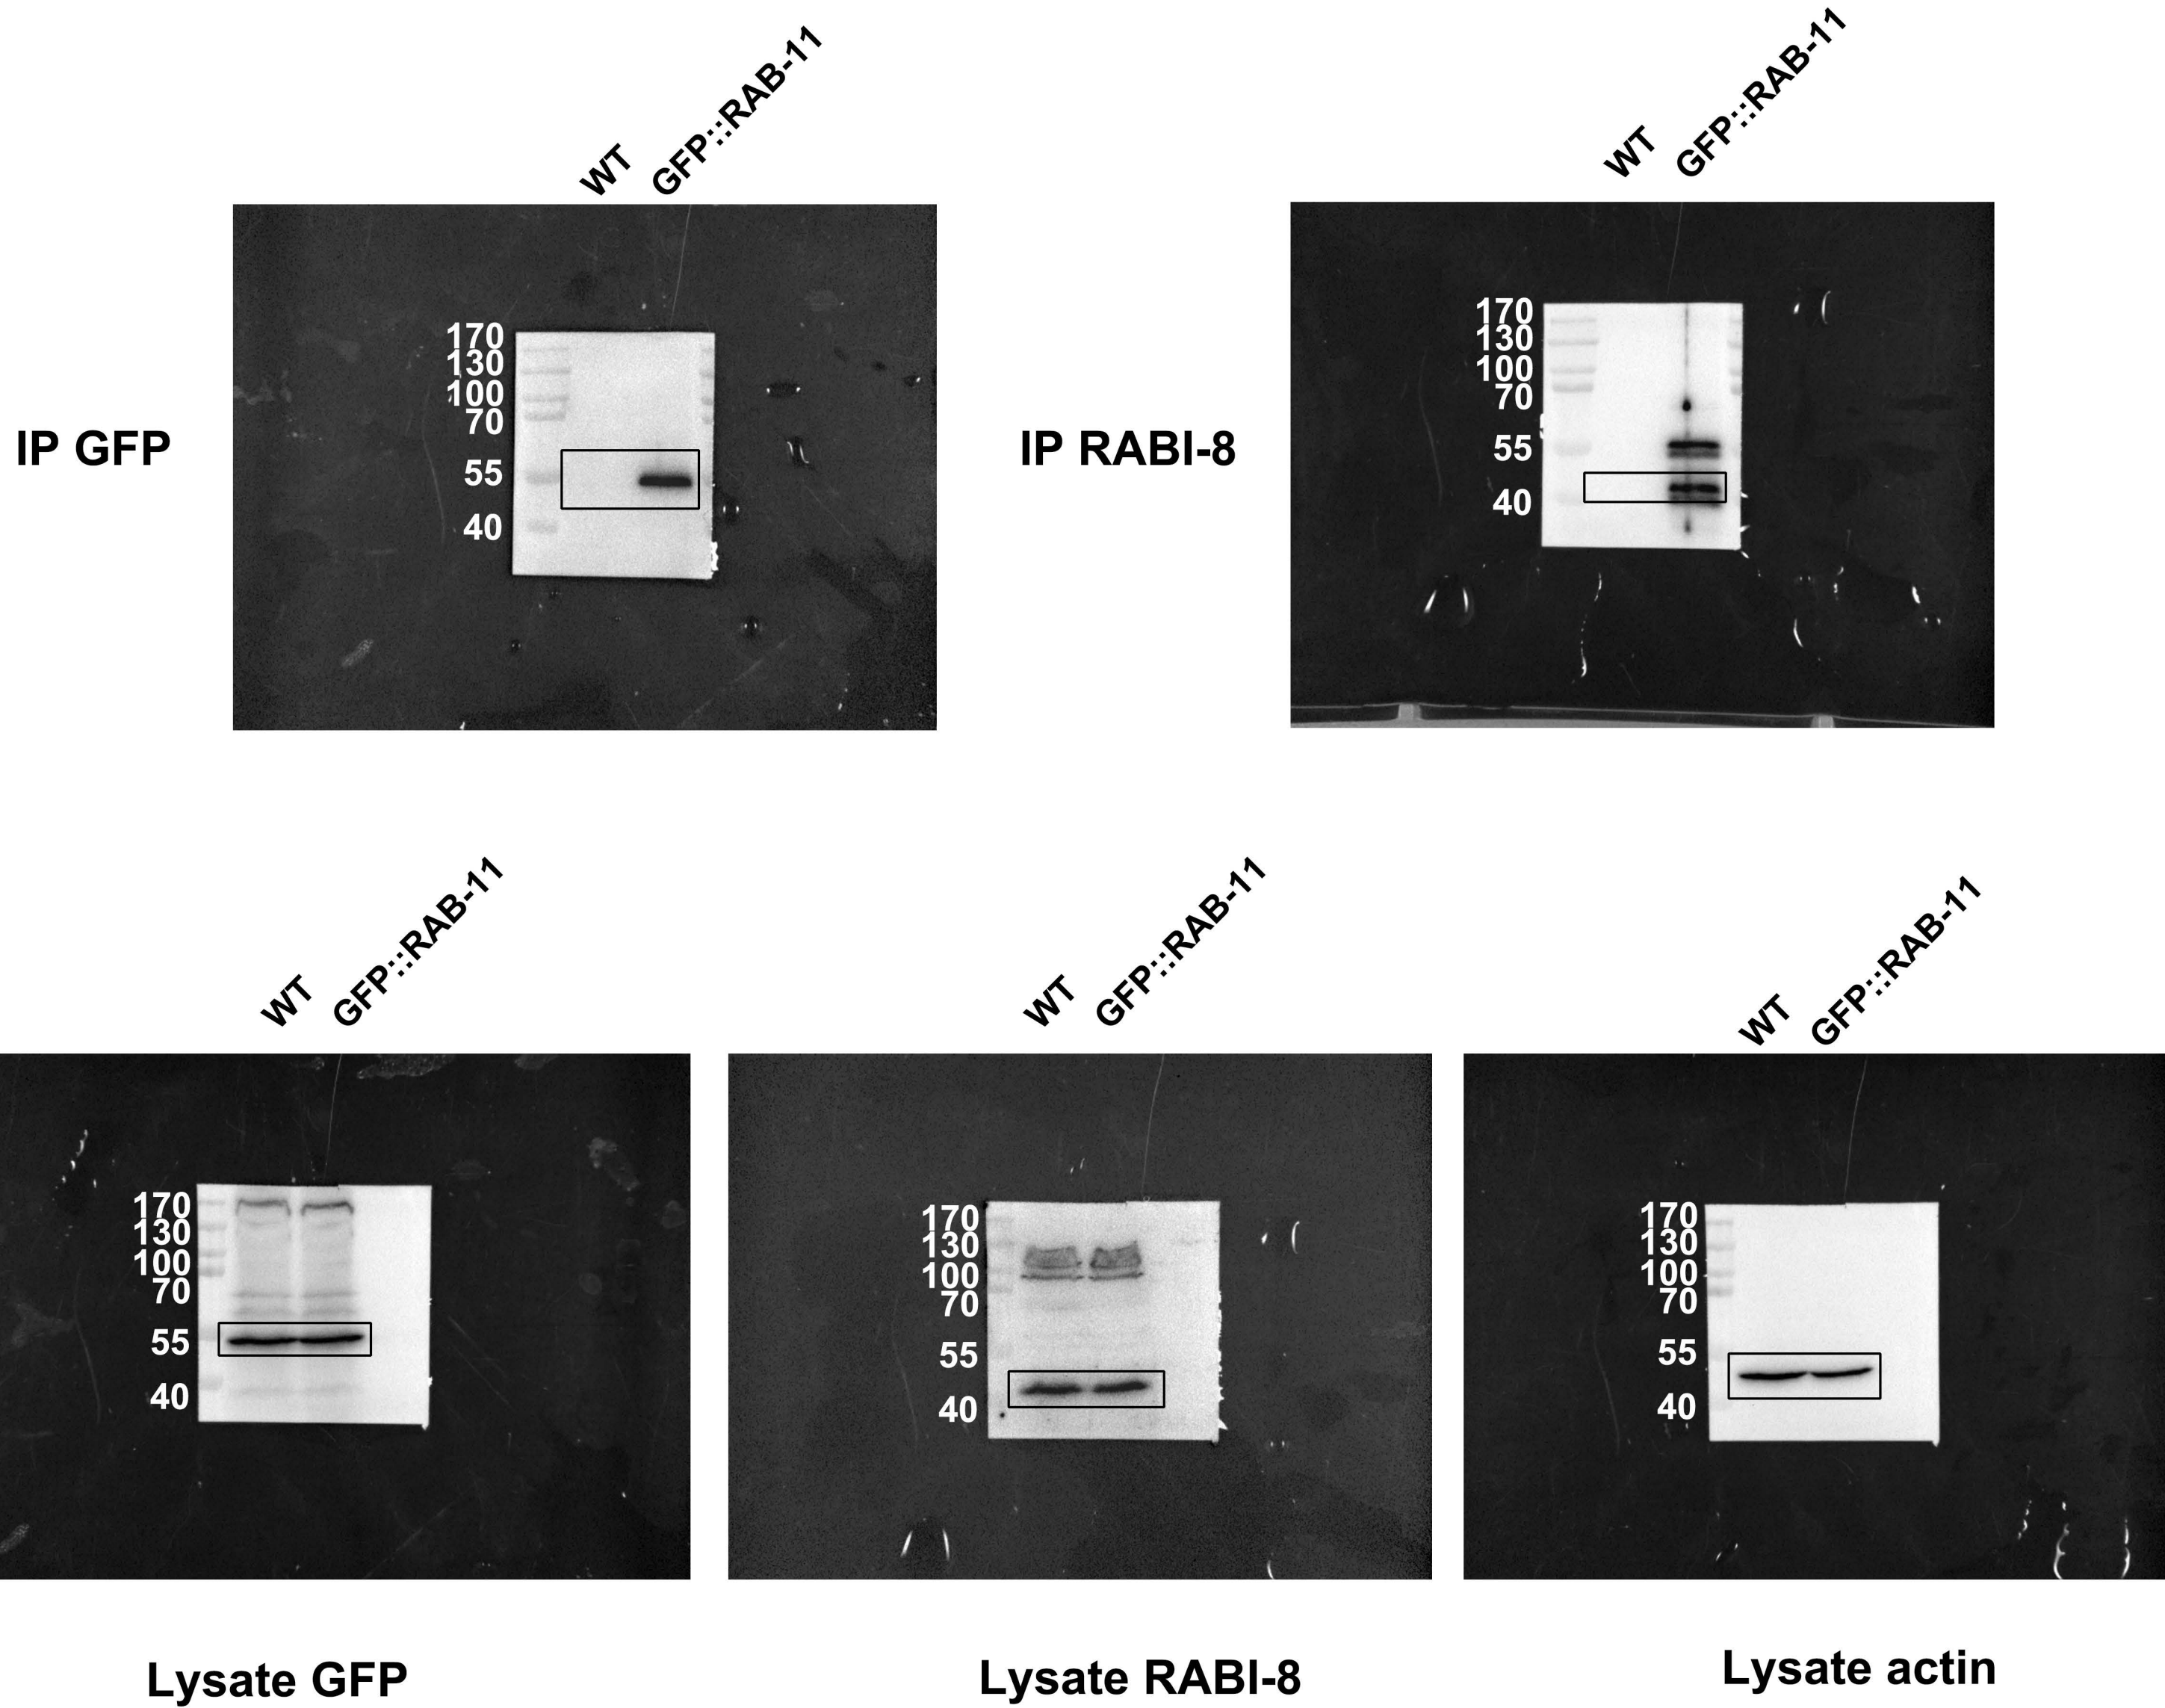

Supplement: JCB_202306107_SourceDataF6.pdf [file JCB_202306107_SourceDataF6.pdf]

Figure 7F

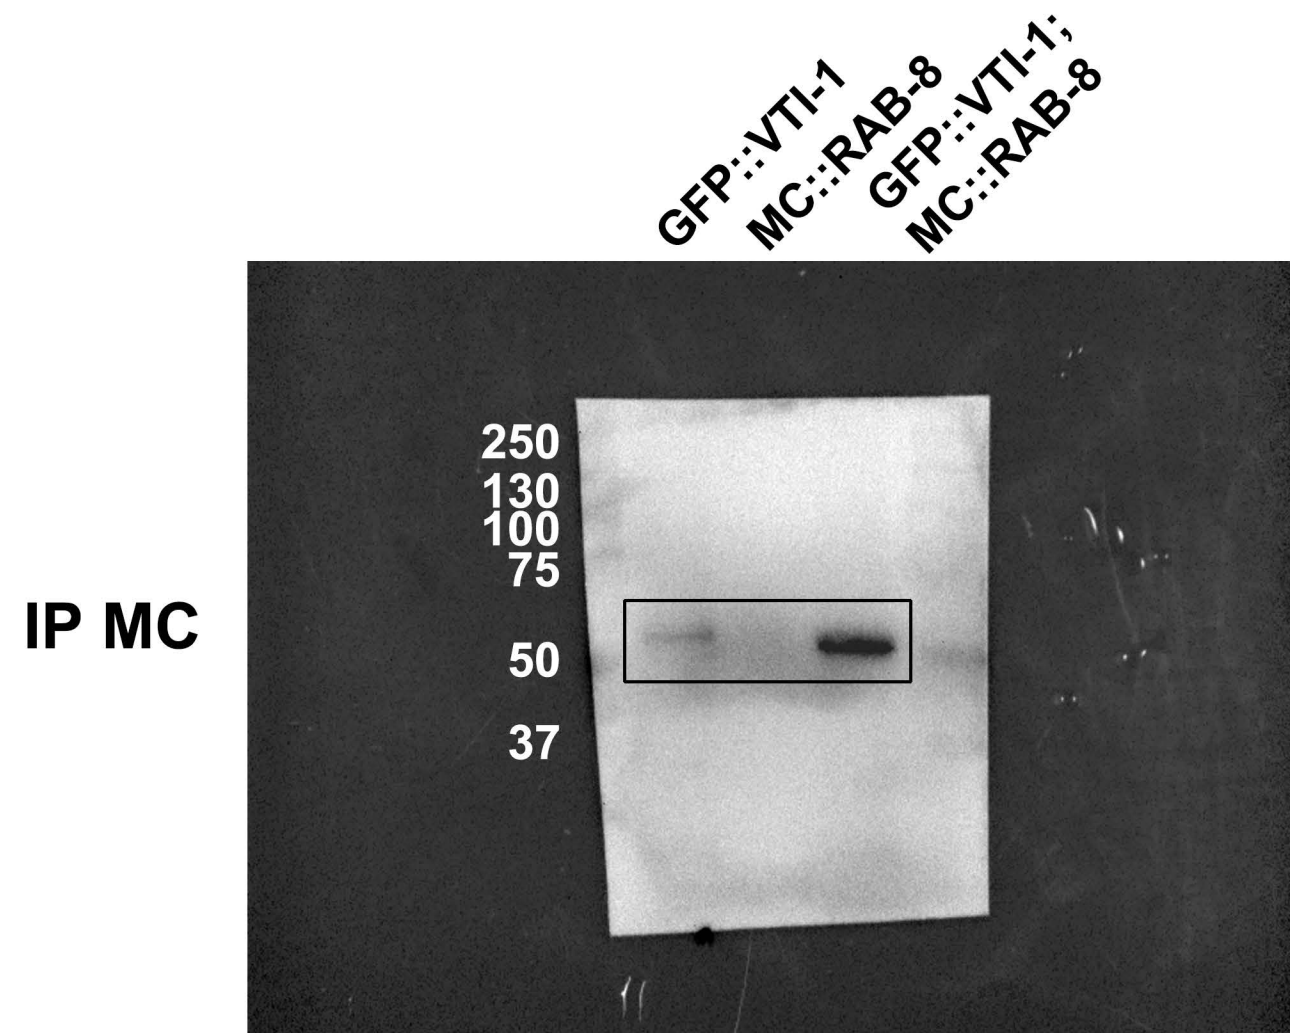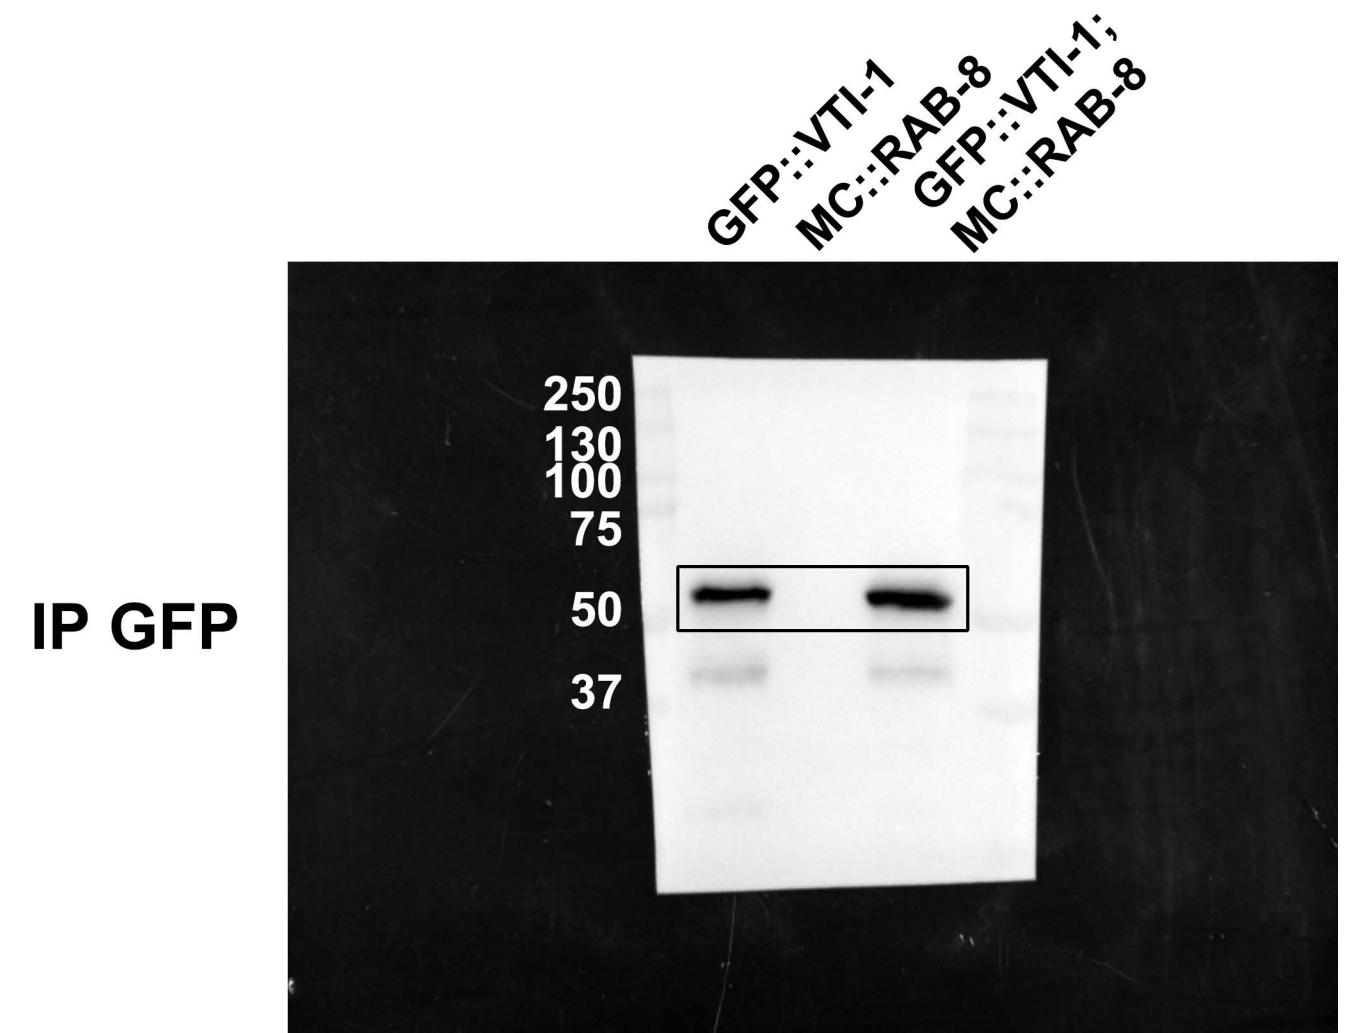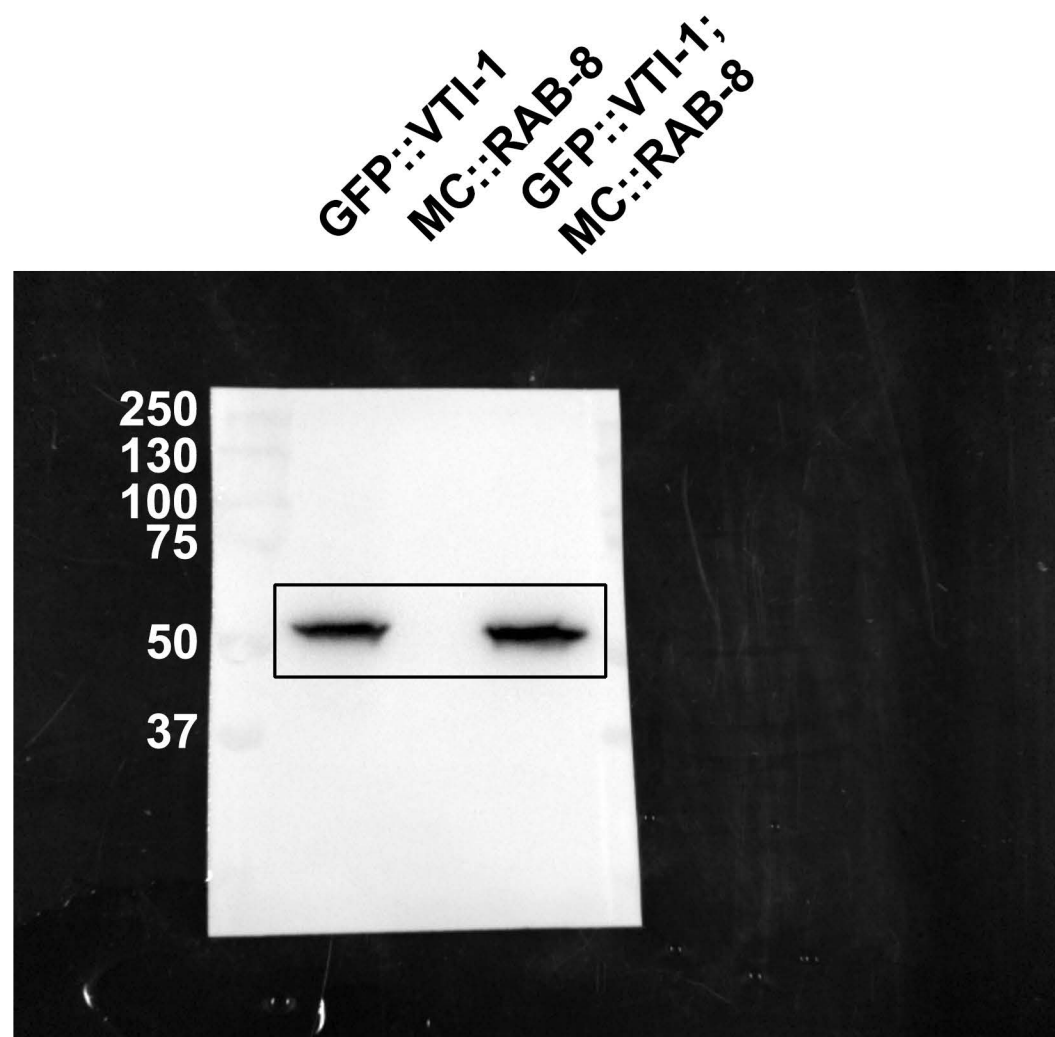

Lysate GFP

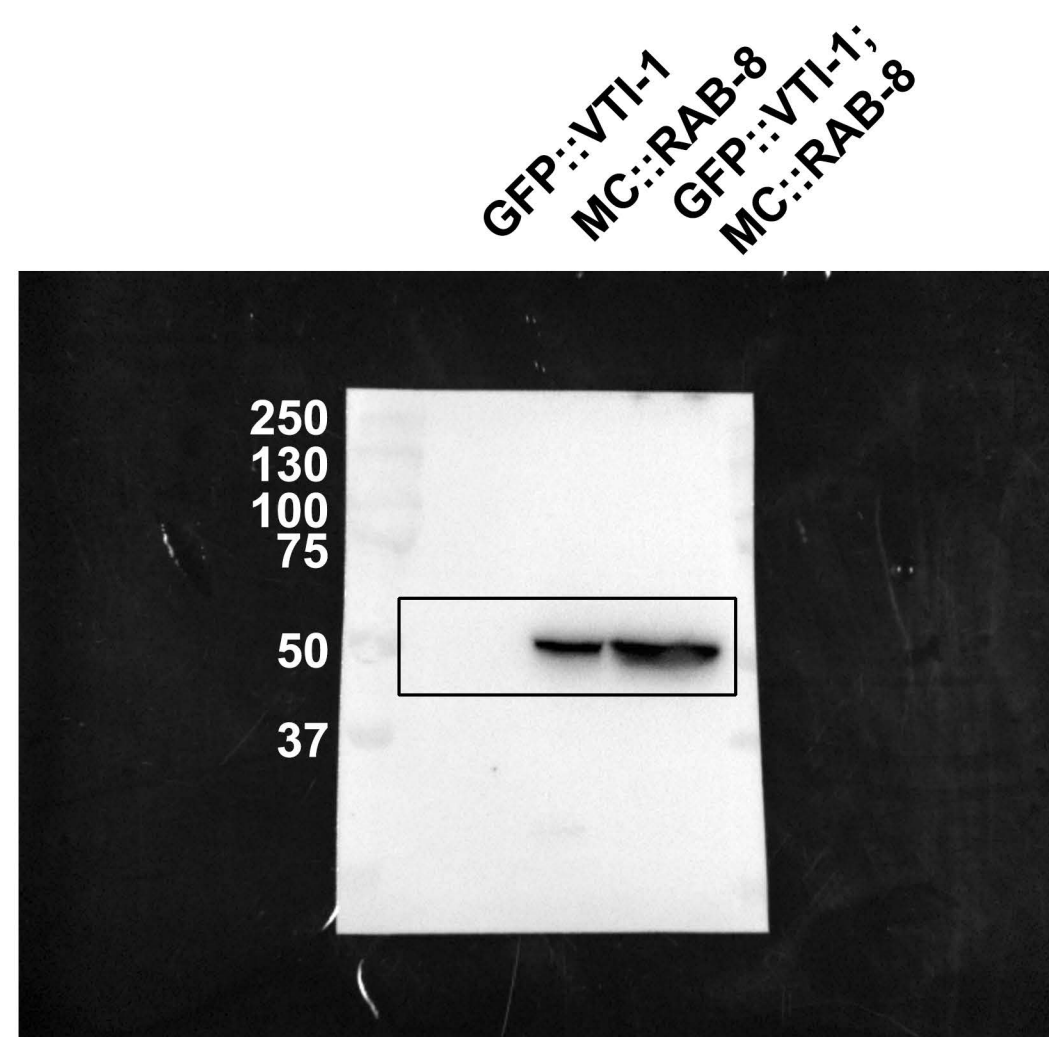

Lysate MC

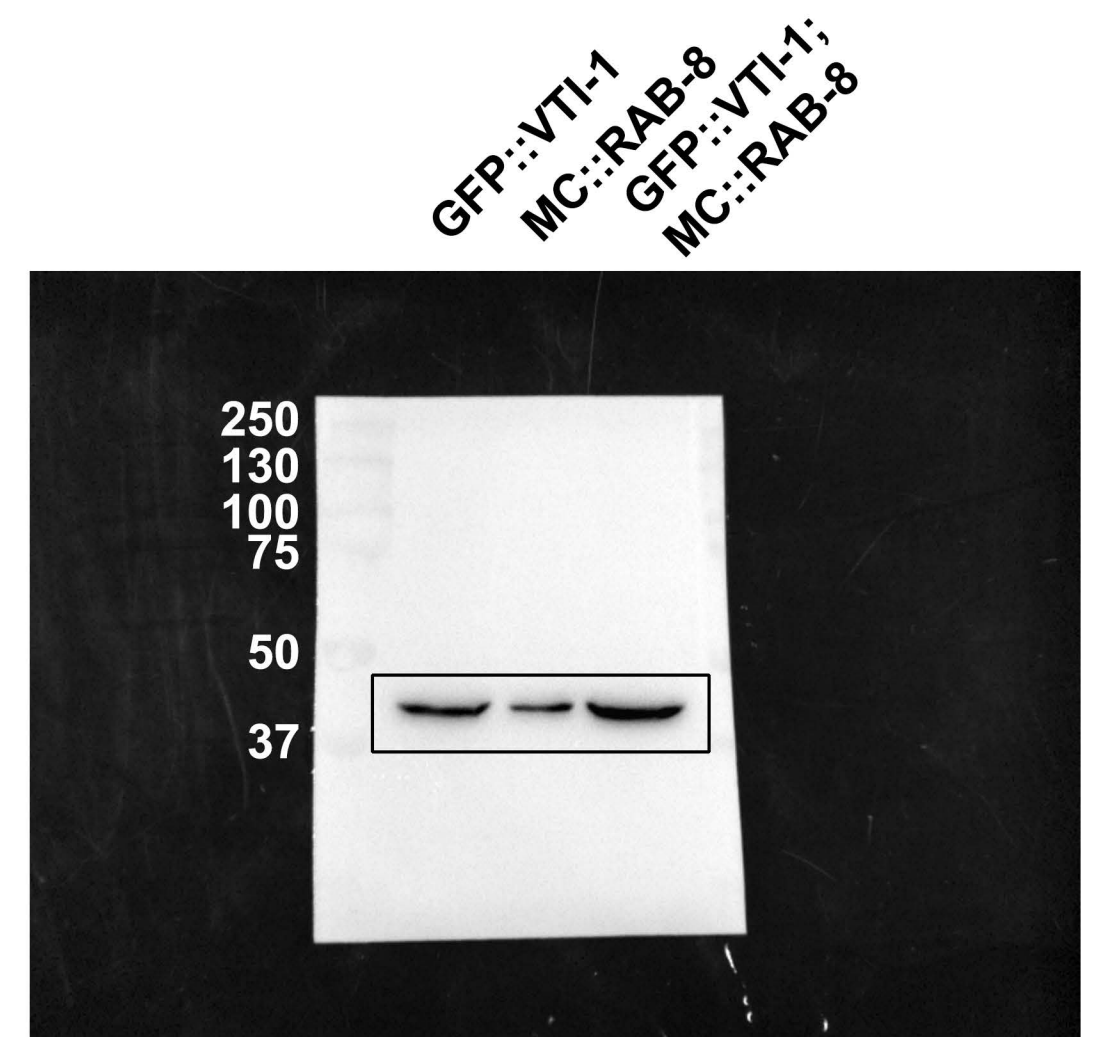

Lysate actin

Supplement: JCB_202306107_SourceDataF7.pdf [file JCB_202306107_SourceDataF7.pdf]

sFigure 1B

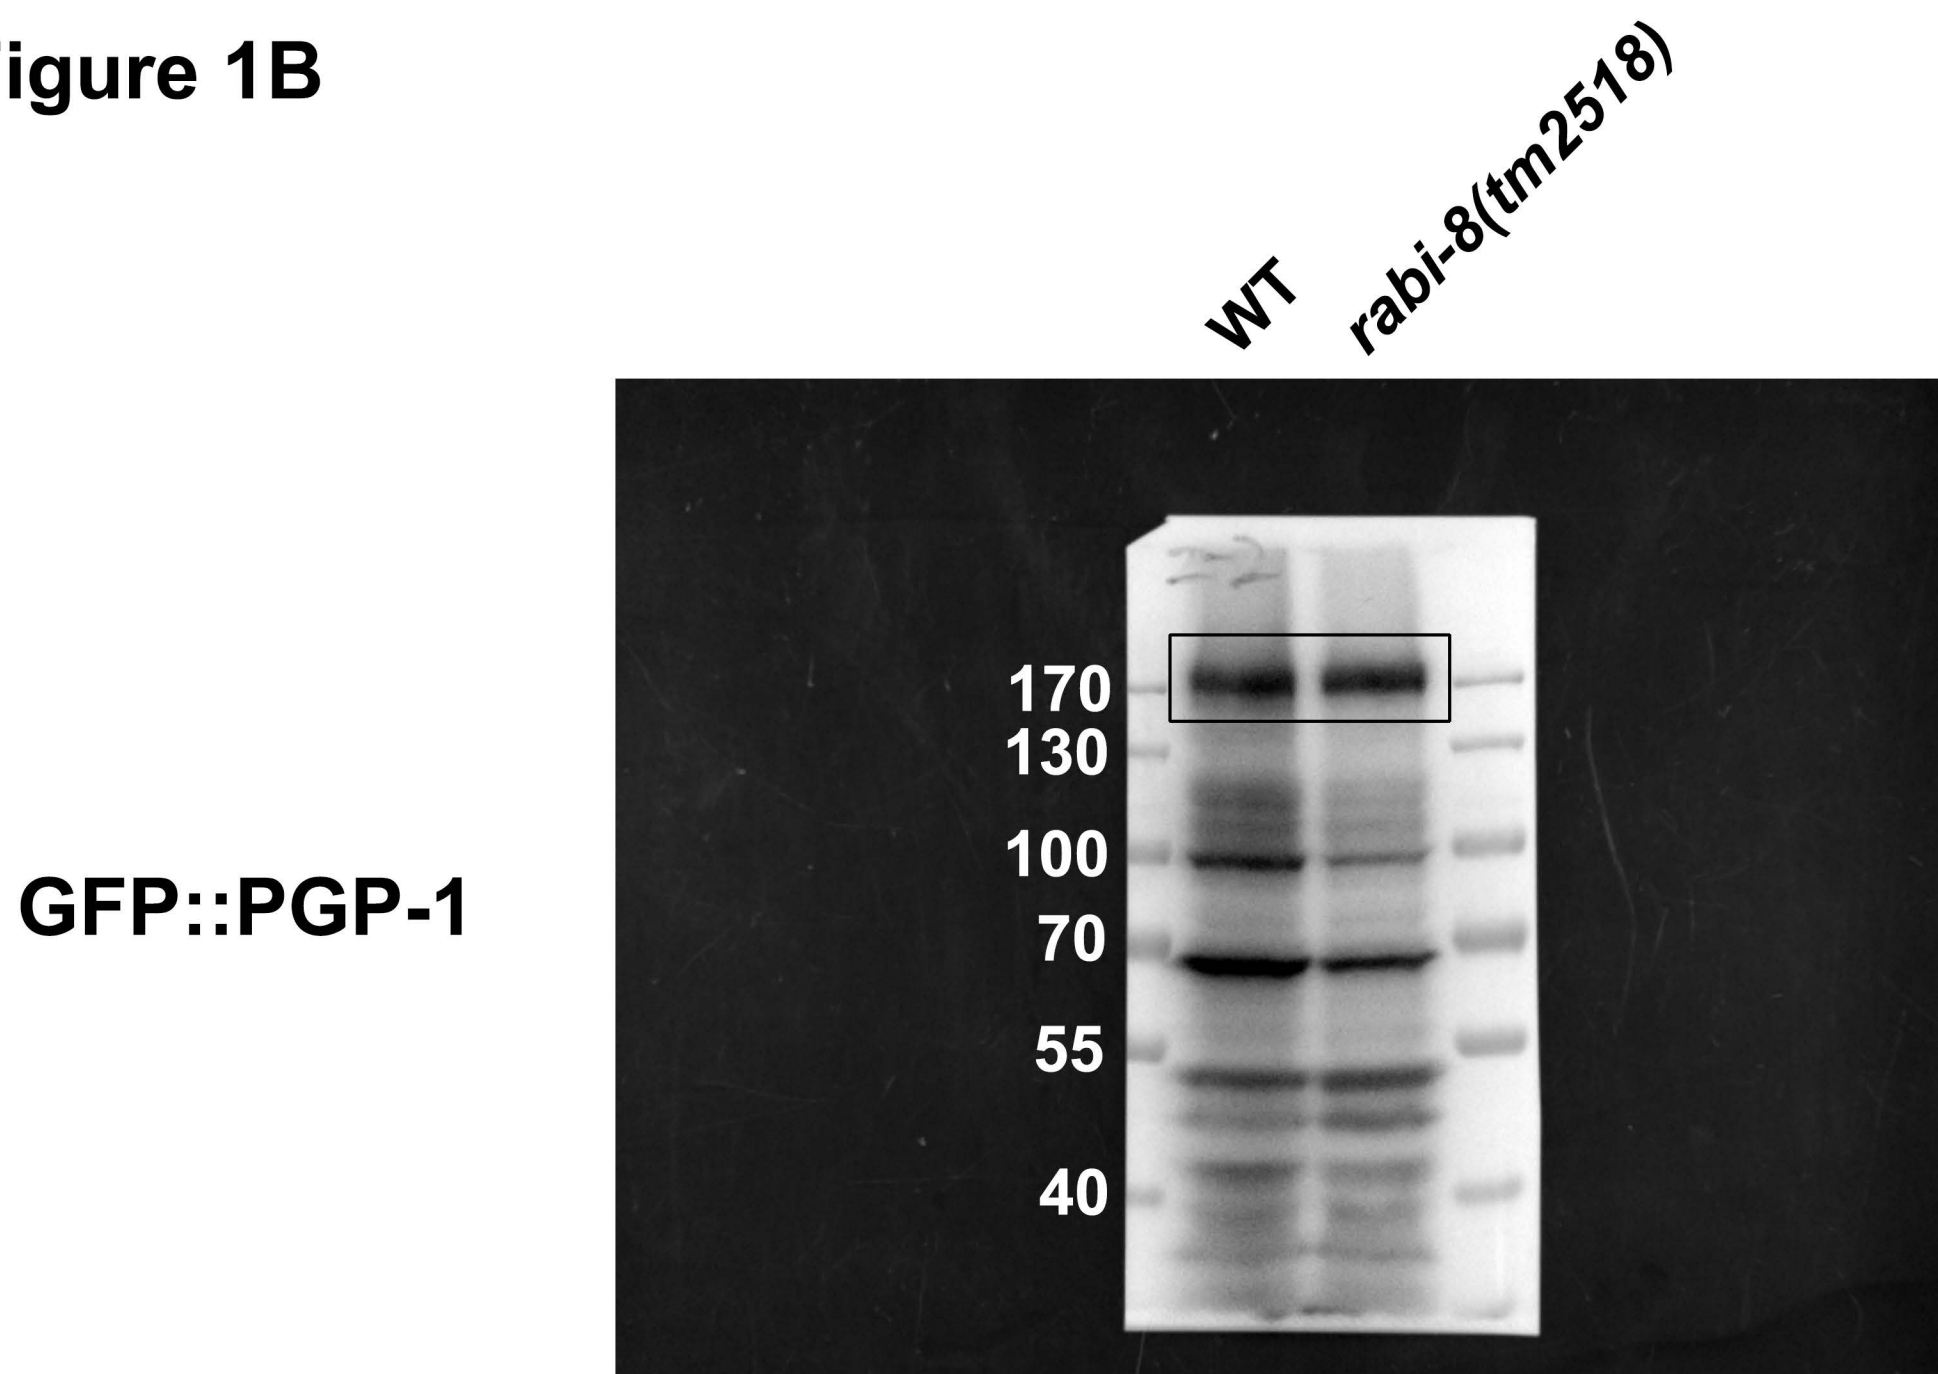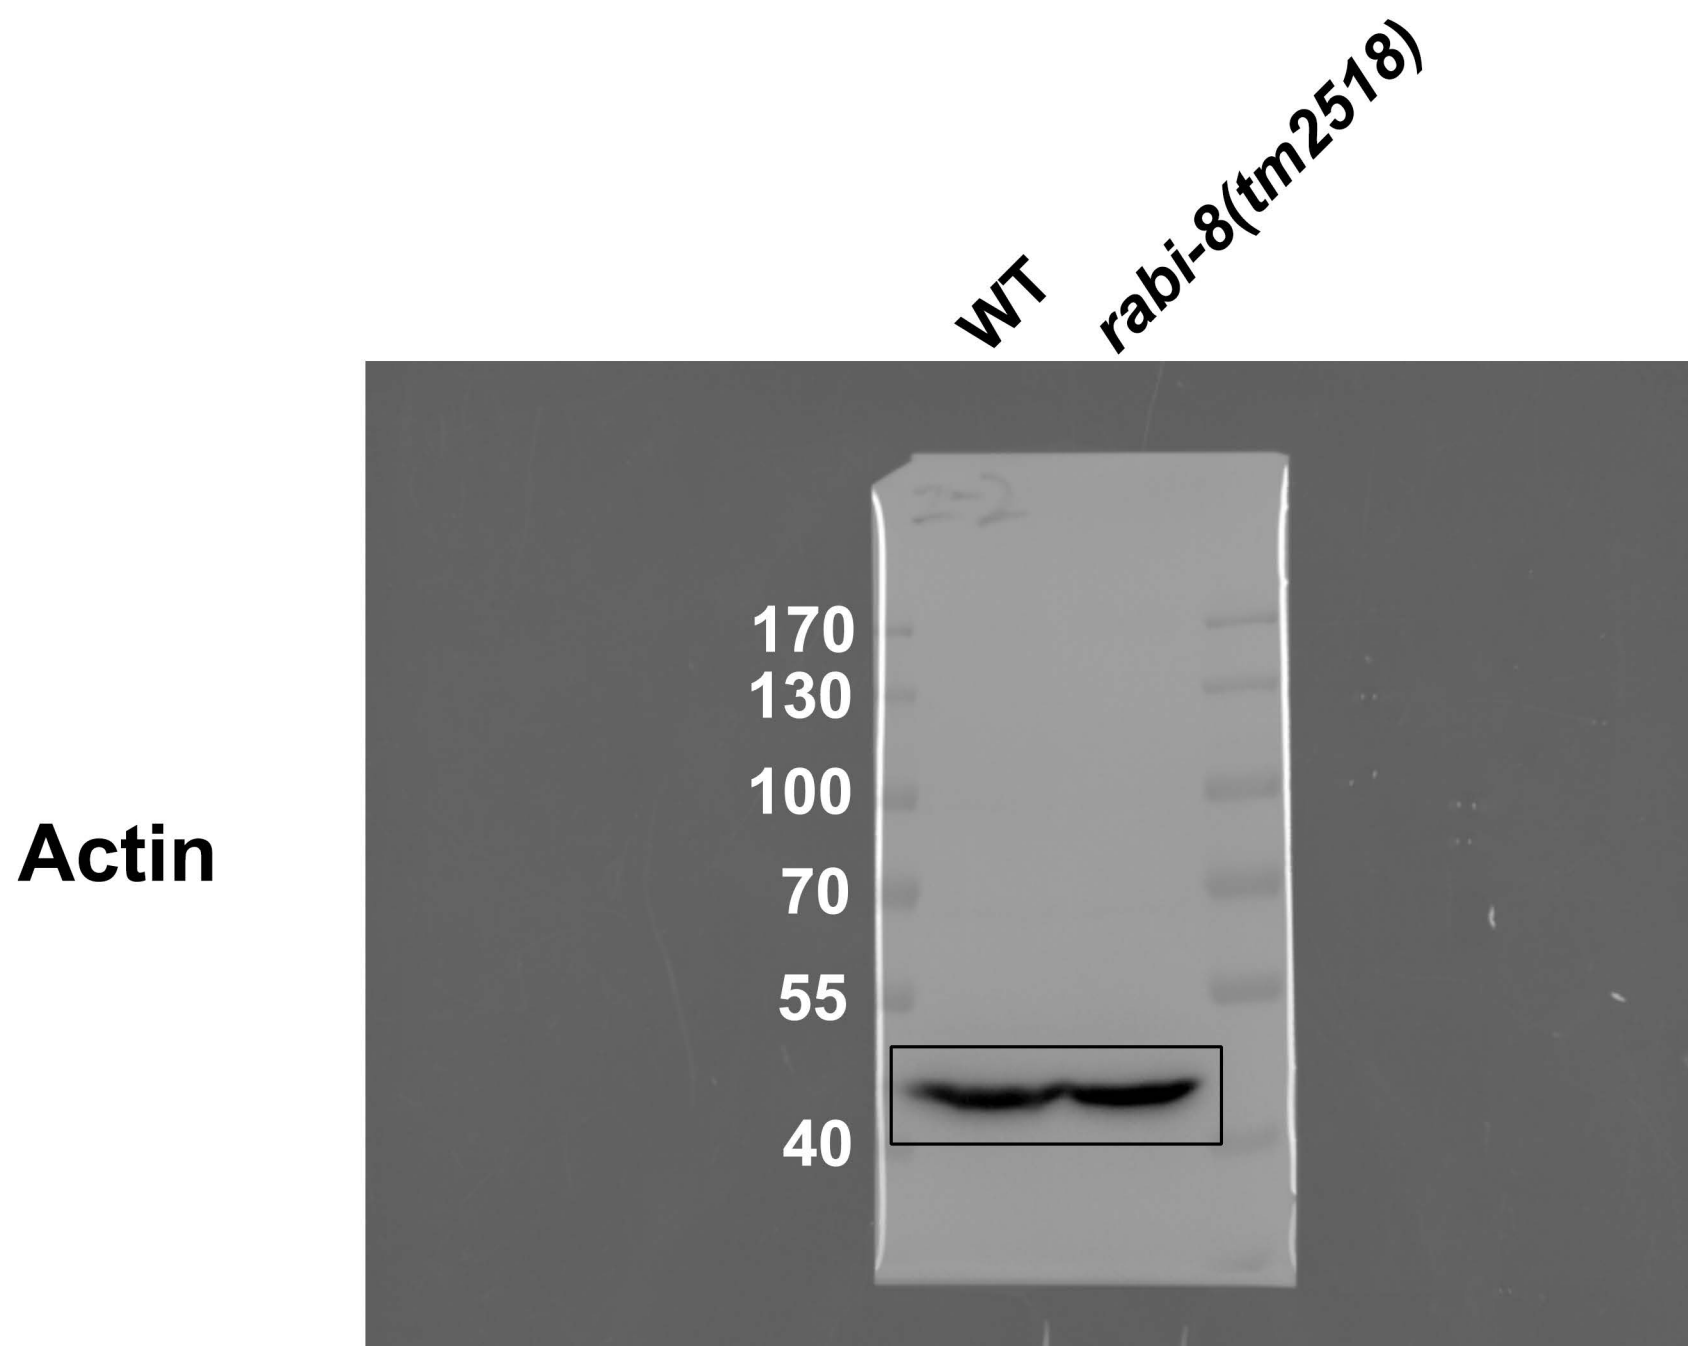

Supplement: JCB_202306107_SourceDataFS1.pdf [file JCB_202306107_SourceDataFS1.pdf]

sFigure 5B

GFP::**RAB-11**

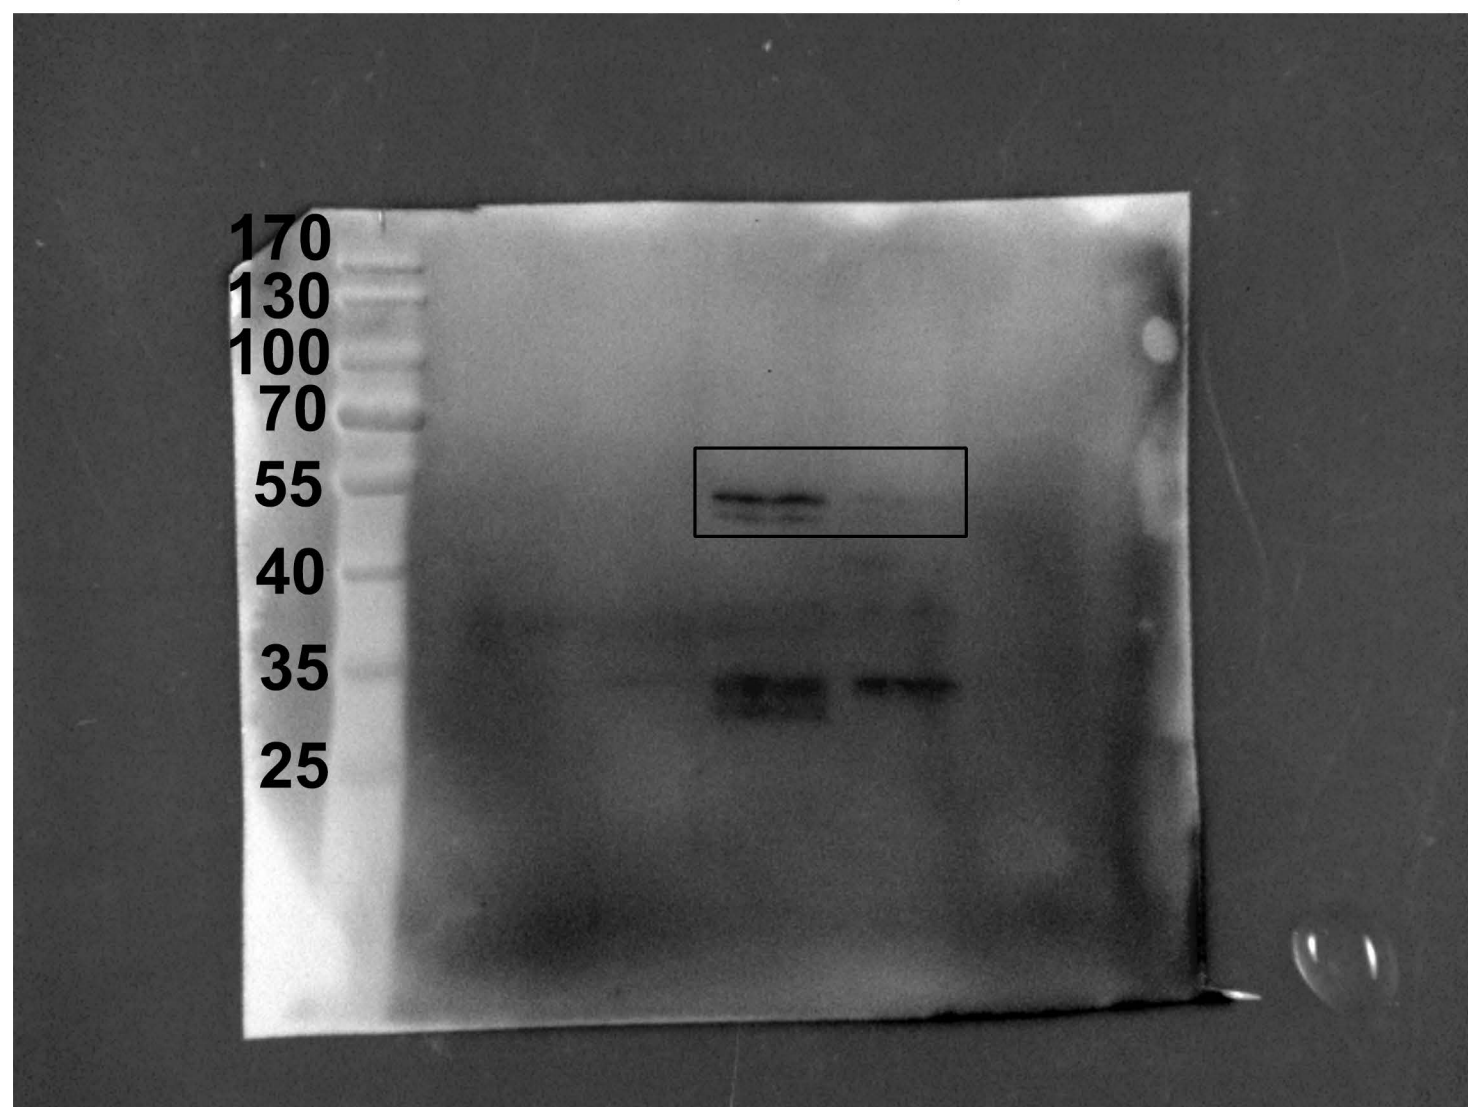

WT

rab-11(RNAi)

**Actin**

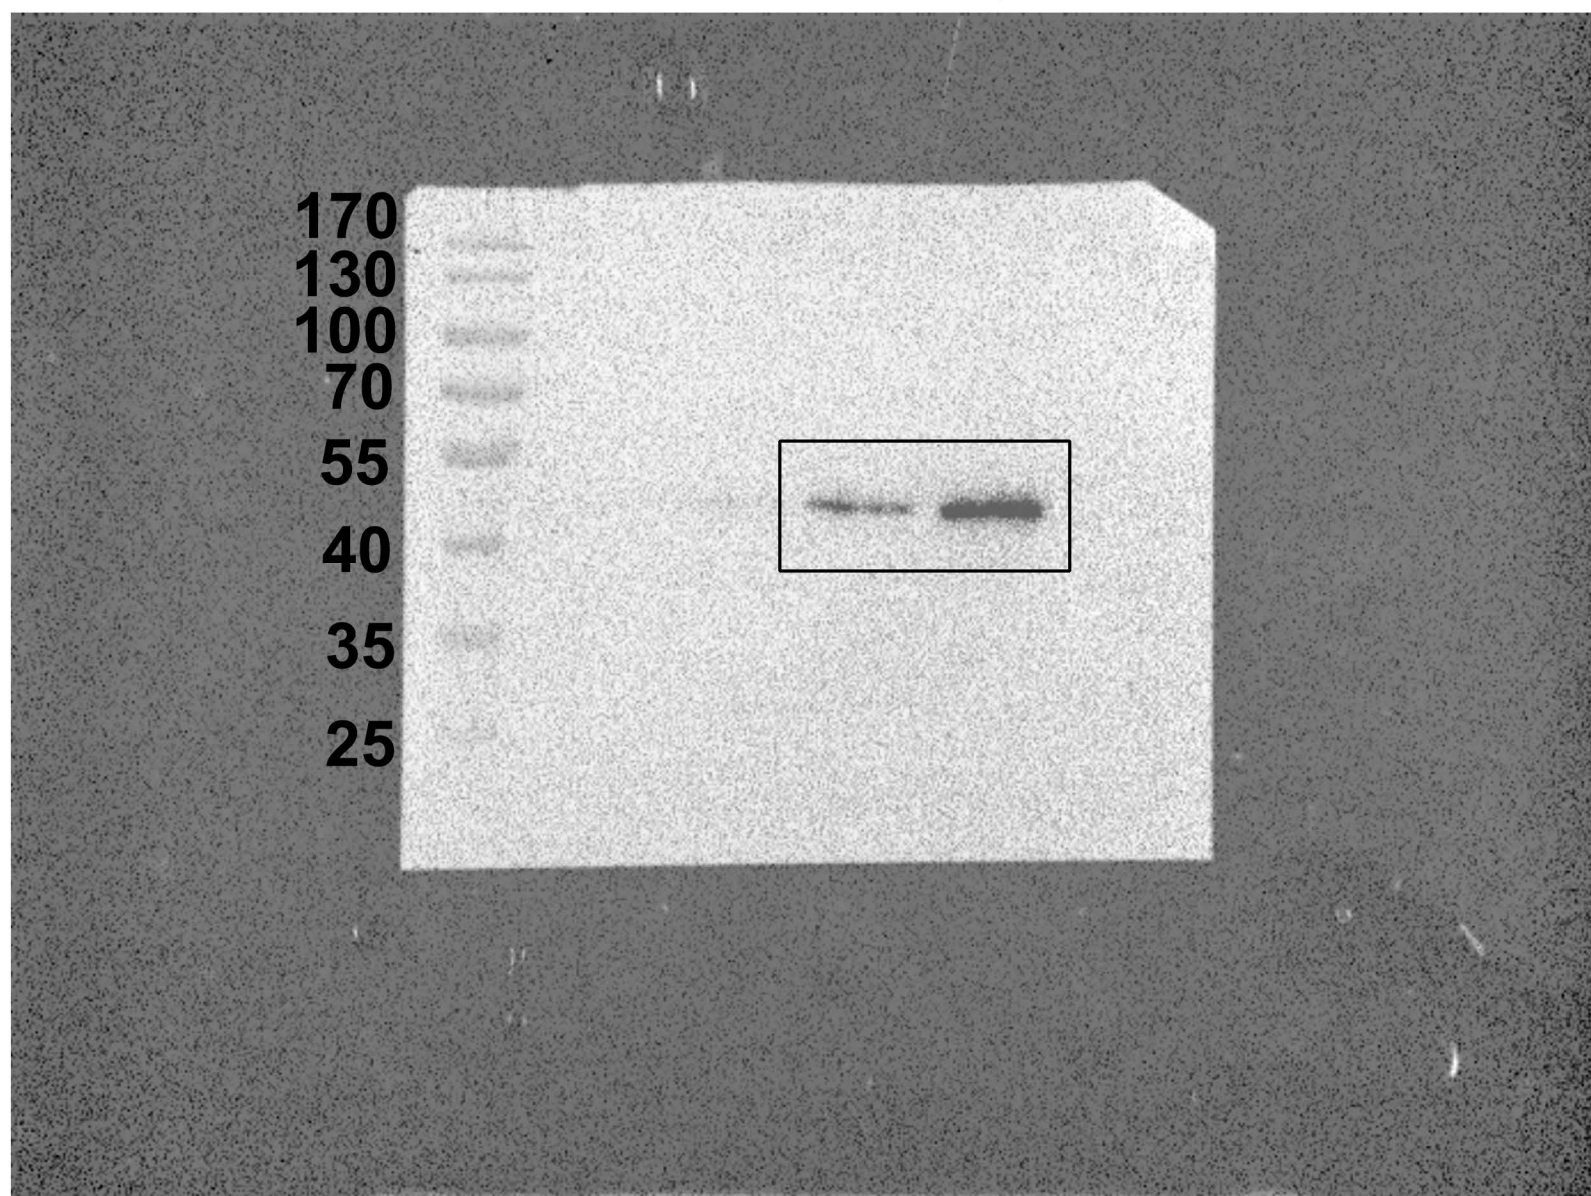

WT

rab-11(RNAi)

sFigure 5C

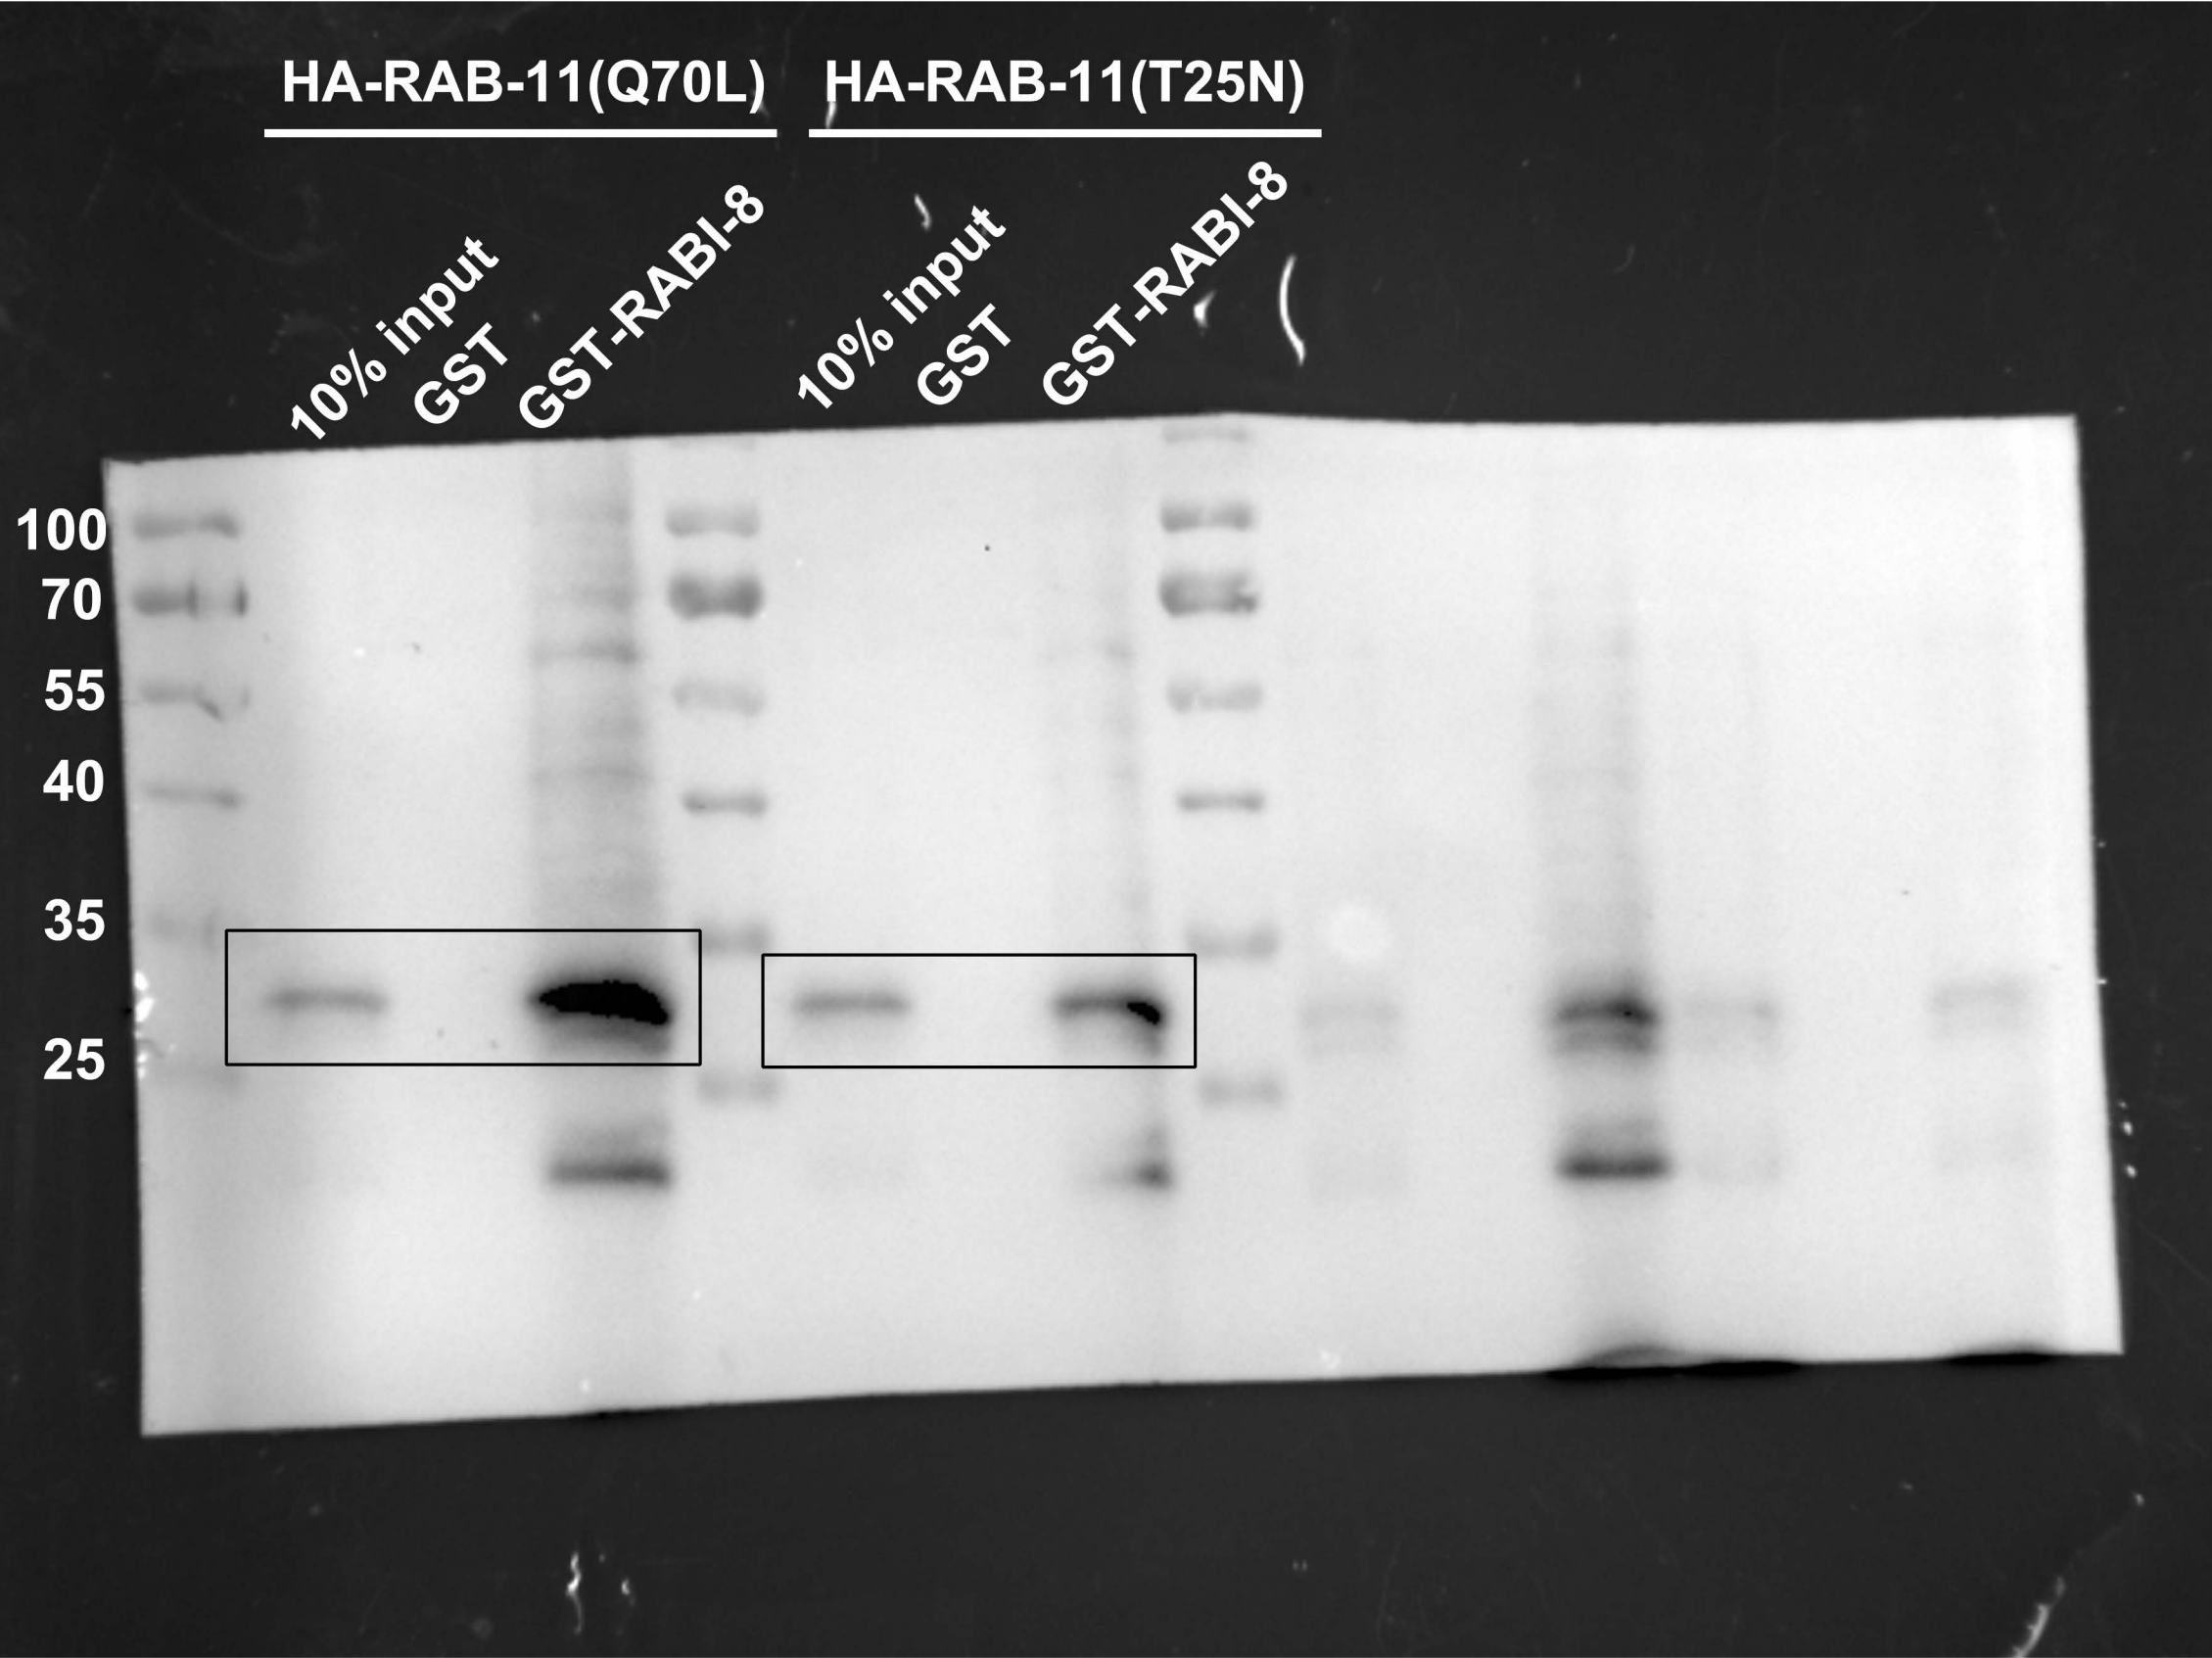

Supplement: JCB_202306107_SourceDataFS5.pdf [file JCB_202306107_SourceDataFS5.pdf]
